# Supplementary material
Source: publisher figshare collection journal article supplement (https://gsajournals.figshare.com/articles/dataset/_/14597676)
Supplement: Supplementary file 1 [file 1]

## Sheet: Y4 DESeq2 v1
Locus Name (sorted by chromosome)	Differential Expression Log2 Ratio	Differential Expression Adjusted p-value	Differential Expression Confidence
C1_00010W_A	0.0619878	0.898607	0.4
C1_00010W_B	0.0216542	0.991405	0.1
C1_00020C_A	0.243761	0.41399	1.4
C1_00020C_B	0.197916	0.745308	0.8
C1_00030C_A	0.198191	0.658612	0.9
C1_00030C_B	0.309599	0.145516	2.1
C1_00040W_A	0.152338	0.712856	0.8
C1_00040W_B	0.498037	1.30686e-06	8
C1_00050C_A	9.45099e-05	NA	0
C1_00050C_B	-0.00479658	NA	-0.1
C1_00060W_A	0.137554	0.47178	1.2
C1_00060W_B	0.089592	0.795284	0.7
C1_00070W_A	0.0259129	0.975032	0.2
C1_00070W_B	0.139562	0.463594	1.3
C1_00080C_A	0.00747396	0.995046	0
C1_00080C_B	0.131981	0.854408	0.5
C1_00090W_A	0.0979805	0.9058	0.4
C1_00090W_B	0.085849	0.931098	0.3
C1_00100C_A	0.0894535	0.926578	0.3
C1_00100C_B	0.146776	0.809422	0.6
C1_00110W_A	0.0103744	0.993626	0.1
C1_00110W_B	-0.0322926	0.961765	-0.2
C1_00120C_A	-0.0561865	0.956197	-0.2
C1_00120C_B	0.0246755	0.992137	0.1
C1_00130C_A	-0.102959	0.902946	-0.4
C1_00130C_B	0.119344	0.867619	0.5
C1_00140W_A	-0.114663	0.853558	-0.5
C1_00140W_B	-0.051843	0.957388	-0.2
C1_00150C_A	0.17017	0.798916	0.7
C1_00150C_B	0.0685606	0.958402	0.2
C1_00160C_A	-0.0776314	0.711177	-0.8
C1_00160C_B	-0.0656226	0.809486	-0.6
C1_00170W_A	-0.23919	0.463594	-1.3
C1_00170W_B	-0.268499	0.358051	-1.5
C1_00180W_A	0.100597	0.175658	2
C1_00180W_B	0.0890354	0.269735	1.7
C1_00190C_A	0.0511715	NA	0.4
C1_00190C_B	-0.0249071	NA	-0.2
C1_00200C_A	0.0707406	0.94149	0.3
C1_00200C_B	0.0582145	0.9532	0.2
C1_00210C_A	0.11613	0.711846	0.8
C1_00210C_B	0.0228777	0.985845	0.1
C1_00220W_A	-0.00433605	0.994976	0
C1_00220W_B	-0.11133	0.602316	-1
C1_00230C_A	0.254536	0.533894	1.1
C1_00230C_B	0.00359925	0.997432	0
C1_00240C_A	-0.011669	NA	-0.2
C1_00240C_B	0.00507447	NA	0.1
C1_00270W_A	0.0746215	0.954981	0.2
C1_00270W_B	0.0287333	0.992764	0.1
C1_00280C_A	0.0114392	NA	0.2
C1_00280C_B	-0.0187128	NA	-0.2
C1_00290W_A	0.122975	0.889861	0.4
C1_00290W_B	0.0610691	0.956197	0.2
C1_00310W_A	0.438568	0.0329829	3
C1_00310W_B	0.467551	0.0253969	3.1
C1_00320W_A	0.117105	0.898607	0.4
C1_00320W_B	0.151215	0.841956	0.5
C1_00330C_A	0.116072	0.882514	0.4
C1_00330C_B	0.186933	0.680556	0.9
C1_00340W_A	0.0596023	0.946172	0.3
C1_00340W_B	0.00459624	0.996522	0
C1_00350C_A	0.0272205	0.992137	0.1
C1_00350C_B	0.0566631	0.956197	0.2
C1_00360W_A	-0.0088231	0.994976	0
C1_00360W_B	-0.119966	0.899191	-0.4
C1_00370W_A	0.241786	0.57512	1.1
C1_00370W_B	0.122457	0.890129	0.4
C1_00380C_A	-0.00531011	0.996522	0
C1_00380C_B	0.123608	0.875817	0.5
C1_00390W_A	0.0780017	0.947385	0.3
C1_00390W_B	0.150685	0.831551	0.6
C1_00400W_A	-0.039027	0.968987	-0.2
C1_00400W_B	0.0241252	0.992076	0.1
C1_00410C_A	0.0722298	0.95384	0.2
C1_00410C_B	0.0645374	0.958866	0.2
C1_00420W_A	0.0646443	0.953832	0.2
C1_00420W_B	-0.0573367	0.958638	-0.2
C1_00430W_A	-0.0103801	0.994976	0
C1_00430W_B	-0.0333797	0.992137	-0.1
C1_00440W_A	-0.0488732	0.95384	-0.2
C1_00440W_B	0.00935505	0.994976	0
C1_00450C_A	0.0172754	0.993082	0.1
C1_00450C_B	0.0500026	0.957388	0.2
C1_00460W_A	-0.0740894	0.924107	-0.3
C1_00460W_B	0.104339	0.852671	0.5
C1_00470C_A	0.0991754	0.924906	0.3
C1_00470C_B	0.0281138	0.992762	0.1
C1_00480C_A	-0.0243784	0.985939	-0.1
C1_00480C_B	-0.239436	0.163353	-2
C1_00490C_A	0.19974	0.398344	1.4
C1_00490C_B	0.187981	0.496531	1.2
C1_00500C_A	-0.0767416	0.885207	-0.4
C1_00500C_B	0.148443	0.558648	1.1
C1_00510W_A	-0.0373547	0.985845	-0.1
C1_00510W_B	0.0352553	0.985939	0.1
C1_00520W_A	-0.142407	0.858594	-0.5
C1_00520W_B	-0.161667	0.813841	-0.6
C1_00530C_A	-0.0577225	0.967658	-0.2
C1_00530C_B	-0.0763314	0.953832	-0.2
C1_00540C_A	0.104203	0.904278	0.4
C1_00540C_B	-0.166505	0.76511	-0.7
C1_00550W_A	0.0449391	0.984656	0.1
C1_00550W_B	-0.049837	0.980497	-0.1
C1_00560W_A	0.206532	0.608169	1
C1_00560W_B	0.214092	0.558268	1.1
C1_00570C_A	-0.200486	0.723391	-0.8
C1_00570C_B	0.0734724	0.956042	0.2
C1_00580W_A	-0.181853	0.779268	-0.7
C1_00580W_B	0.038463	0.986443	0.1
C1_00590W_A	-0.108278	0.462188	-1.3
C1_00590W_B	-0.115714	0.371392	-1.5
C1_00600W_A	-0.374046	0.143223	-2.1
C1_00600W_B	-0.139551	0.862504	-0.5
C1_00610W_A	0.00296945	0.997432	0
C1_00610W_B	0.0864503	0.899191	0.4
C1_00620W_A	0.189488	0.743415	0.8
C1_00620W_B	0.0907333	0.927194	0.3
C1_00630W_A	-0.00625021	0.996522	0
C1_00630W_B	0.0873329	0.933647	0.3
C1_00640C_A	-0.120807	0.738506	-0.8
C1_00640C_B	-0.20384	0.311219	-1.6
C1_00650C_A	0.122304	0.847031	0.5
C1_00650C_B	0.0676869	0.946172	0.3
C1_00660C_A	0.114445	0.897348	0.4
C1_00660C_B	0.197111	0.69166	0.9
C1_00670C_A	-0.0989577	0.928603	-0.3
C1_00670C_B	0.0129421	0.994976	0
C1_00680W_A	-0.201084	0.733858	-0.8
C1_00680W_B	-0.0616218	0.967567	-0.2
C1_00690W_A	0.0220248	0.993289	0.1
C1_00690W_B	-0.229086	0.647944	-0.9
C1_00700W_A	-0.0799942	0.946172	-0.3
C1_00700W_B	-0.132053	0.875442	-0.5
C1_00710C_A	0.00821781	0.994976	0
C1_00710C_B	0.118622	0.608169	1
C1_00720W_A	-0.00925954	NA	-0.1
C1_00720W_B	0.0294358	NA	0.4
C1_00730C_A	-0.0540375	0.95979	-0.2
C1_00730C_B	-0.0857502	0.92151	-0.3
C1_00740C_A	0.105149	0.809422	0.6
C1_00740C_B	0.0205708	0.990541	0.1
C1_00750C_A	-0.133366	0.871051	-0.5
C1_00750C_B	-0.197594	0.70628	-0.8
C1_00760W_A	0.0069503	0.99558	0
C1_00760W_B	-0.0515626	0.978391	-0.1
C1_00770C_A	0.0386223	0.987314	0.1
C1_00770C_B	-0.0180858	0.994976	0
C1_00780C_A	-0.00329393	0.997432	0
C1_00780C_B	0.138176	0.829576	0.6
C1_00790W_A	-0.0360322	0.989886	-0.1
C1_00790W_B	0.20868	0.700792	0.8
C1_00800C_A	-0.0149315	0.994428	-0.1
C1_00800C_B	0.0975278	0.881816	0.4
C1_00810W_A	0.168742	0.811228	0.6
C1_00810W_B	0.118931	0.900797	0.4
C1_00820W_A	-0.0393185	0.981067	-0.1
C1_00820W_B	0.00141186	0.998692	0
C1_00830W_A	-0.219554	0.532176	-1.2
C1_00830W_B	-0.0949694	0.904278	-0.4
C1_00840C_A	-0.0394951	0.981459	-0.1
C1_00840C_B	-0.114492	0.867619	-0.5
C1_00850W_A	0.0517891	0.967658	0.2
C1_00850W_B	0.0630338	0.961765	0.2
C1_00860W_A	0.157007	0.827011	0.6
C1_00860W_B	-0.180589	0.755705	-0.7
C1_00870W_A	-0.103334	0.896652	-0.4
C1_00870W_B	0.263117	0.407065	1.4
C1_00880W_A	-0.106739	0.798916	-0.7
C1_00880W_B	-0.016354	0.993082	-0.1
C1_00890W_A	0.291237	0.390133	1.4
C1_00890W_B	-0.0977357	0.929705	-0.3
C1_00900W_A	0.132199	0.755705	0.7
C1_00900W_B	0.0349017	0.979975	0.1
C1_00910W_A	0.142673	0.867619	0.5
C1_00910W_B	0.11111	0.913238	0.4
C1_00920W_A	-0.187462	0.759171	-0.7
C1_00920W_B	0.00160896	0.998698	0
C1_00930C_A	-0.0759713	0.899878	-0.4
C1_00930C_B	-0.012315	0.994713	0
C1_00940W_A	0.118277	0.887101	0.4
C1_00940W_B	-0.030047	0.987602	-0.1
C1_00950C_A	0.240784	0.10408	2.3
C1_00950C_B	0.131725	0.695535	0.8
C1_00960C_A	0.055491	0.967658	0.2
C1_00960C_B	-0.000963862	0.999768	0
C1_00970W_A	0.0826296	0.943591	0.3
C1_00970W_B	-0.105832	0.907813	-0.4
C1_00980W_A	0.179715	0.683293	0.9
C1_00980W_B	0.219679	0.538449	1.1
C1_00990C_A	-0.0401525	0.969158	-0.2
C1_00990C_B	-0.156947	0.625315	-1
C1_01000C_A	0.152892	0.850169	0.5
C1_01000C_B	0.0364372	0.990541	0.1
C1_01010W_A	-0.0262498	0.986043	-0.1
C1_01010W_B	0.102595	0.865683	0.5
C1_01020W_A	0.000186767	NA	0
C1_01020W_B	NA	NA	0
C1_01030W_A	0.171521	0.382798	1.4
C1_01030W_B	0.168177	0.371392	1.5
C1_01040W_A	0.137245	0.87252	0.5
C1_01040W_B	0.138808	0.868967	0.5
C1_01050C_A	0.0971397	0.842539	0.5
C1_01050C_B	-0.0112423	0.994976	0
C1_01060W_A	0.0177366	0.985845	0.1
C1_01060W_B	0.00616809	0.994976	0
C1_01070C_A	0.169153	0.811707	0.6
C1_01070C_B	0.303009	0.368352	1.5
C1_01080W_A	-0.0259266	0.993082	-0.1
C1_01080W_B	-0.047113	0.982265	-0.1
C1_01090C_A	0.305583	0.256895	1.7
C1_01090C_B	0.133217	0.865683	0.5
C1_01100W_A	0.0019388	0.998657	0
C1_01100W_B	-0.0782502	0.947385	-0.3
C1_01110C_A	0.00909035	0.994976	0
C1_01110C_B	0.150611	0.496675	1.2
C1_01130W_A	0.0130943	0.994976	0
C1_01130W_B	0.0281535	0.992762	0.1
C1_01140C_A	0.0122891	0.994976	0
C1_01140C_B	-0.256086	0.470728	-1.3
C1_01150C_A	-0.01998	0.993289	-0.1
C1_01150C_B	-0.0777374	0.94297	-0.3
C1_01160C_A	-0.146475	0.811228	-0.6
C1_01160C_B	0.0308758	0.990541	0.1
C1_01170C_A	0.00389109	0.997432	0
C1_01170C_B	0.151797	0.840424	0.6
C1_01180C_A	-0.168469	0.553202	-1.1
C1_01180C_B	0.0211287	0.993082	0.1
C1_01190C_A	0.00951283	0.994976	0
C1_01190C_B	0.145257	0.840424	0.6
C1_01200W_A	-0.149262	0.85444	-0.5
C1_01200W_B	-0.0956417	0.933647	-0.3
C1_01210W_A	-0.034032	0.990658	-0.1
C1_01210W_B	-0.155327	0.814649	-0.6
C1_01220C_A	-0.0332277	NA	-0.2
C1_01220C_B	-0.00218198	0.997432	0
C1_01240W_A	-0.0824208	0.948789	-0.2
C1_01240W_B	-0.130446	0.883578	-0.4
C1_01250W_A	-0.0280935	0.986075	-0.1
C1_01250W_B	-0.239003	0.316123	-1.6
C1_01260C_A	0.0117639	0.994976	0
C1_01260C_B	-0.137207	0.875173	-0.5
C1_01270W_A	0.072231	0.95407	0.2
C1_01270W_B	0.326712	0.232369	1.8
C1_01280C_A	-0.184681	0.711928	-0.8
C1_01280C_B	-0.000316709	0.999799	0
C1_01290C_A	0.00255349	0.99799	0
C1_01290C_B	0.120828	0.892543	0.4
C1_01300W_A	0.075205	0.907475	0.4
C1_01300W_B	0.203814	0.407677	1.4
C1_01310W_A	-0.0271539	NA	-0.3
C1_01310W_B	-0.0214512	NA	-0.3
C1_01320W_A	-0.110924	0.759265	-0.7
C1_01320W_B	0.114203	0.745308	0.8
C1_01330C_A	0.175747	0.654676	0.9
C1_01330C_B	0.209434	0.480877	1.2
C1_01340C_A	0.0304203	0.992137	0.1
C1_01340C_B	-0.0433579	0.983576	-0.1
C1_01350C_A	0.0707263	0.683398	0.9
C1_01350C_B	0.042772	0.868724	0.5
C1_01360C_A	-0.402441	0.0241705	-3.1
C1_01360C_B	-0.30181	0.152234	-2.1
C1_01370C_A	0.091135	0.702425	0.8
C1_01370C_B	0.100346	0.572069	1.1
C1_01380C_A	-0.0618186	0.95624	-0.2
C1_01380C_B	-0.157353	0.780505	-0.7
C1_01390C_A	-0.120682	0.891207	-0.4
C1_01390C_B	-0.192163	0.748661	-0.7
C1_01400C_A	0.00546636	0.996522	0
C1_01400C_B	-0.120724	0.885207	-0.4
C1_01420C_A	0.0607725	0.961765	0.2
C1_01420C_B	0.268847	0.440824	1.3
C1_01440C_A	0.0289251	NA	0.4
C1_01440C_B	-0.0119396	NA	-0.2
C1_01450W_A	-0.134352	0.834927	-0.6
C1_01450W_B	-0.207483	0.559078	-1.1
C1_01460W_A	-0.00786942	0.99523	0
C1_01460W_B	-0.0407576	0.984656	-0.1
C1_01470W_A	0.0742637	0.902369	0.4
C1_01470W_B	0.0681359	0.928432	0.3
C1_01480C_A	-0.0254532	0.928432	-0.3
C1_01480C_B	-0.0238891	0.943591	-0.3
C1_01490W_A	0.275307	0.00899544	3.7
C1_01490W_B	0.348586	0.000130591	5.8
C1_01500W_A	NA	NA	0
C1_01500W_B	NA	NA	0
C1_01510W_A	0.0610716	NA	0.6
C1_01510W_B	-0.00475099	NA	-0.1
C1_01520C_A	0.0840981	0.889765	0.4
C1_01520C_B	0.0200435	0.992137	0.1
C1_01530C_A	0.0242091	0.973642	0.2
C1_01530C_B	-0.0737384	0.826585	-0.6
C1_01540W_A	0.0925862	0.933509	0.3
C1_01540W_B	0.0316883	0.992137	0.1
C1_01550W_A	0.104029	0.9122	0.4
C1_01550W_B	0.0371885	0.985845	0.1
C1_01560W_A	-0.140444	0.814649	-0.6
C1_01560W_B	-0.401002	0.0482326	-2.7
C1_01570C_A	-0.0452615	0.981048	-0.1
C1_01570C_B	0.127249	0.858594	0.5
C1_01580W_A	0.0890555	0.884641	0.4
C1_01580W_B	0.0585965	0.947385	0.3
C1_01590C_A	-0.118161	0.695613	-0.8
C1_01590C_B	-0.135099	0.63565	-1
C1_01600W_A	0.11071	0.796126	0.7
C1_01600W_B	-0.00117195	0.998692	0
C1_01610C_A	-0.20602	0.424758	-1.3
C1_01610C_B	-0.030111	0.967658	-0.2
C1_01620C_A	0.126506	0.883133	0.4
C1_01620C_B	-0.015156	0.994976	0
C1_01630W_A	0.157754	0.787395	0.7
C1_01630W_B	0.270003	0.313364	1.6
C1_01640W_A	0.0882382	0.707446	0.8
C1_01640W_B	0.144622	0.186514	1.9
C1_01650W_A	0.377795	0.110306	2.3
C1_01650W_B	0.00485317	0.996522	0
C1_01660C_A	NA	NA	0
C1_01660C_B	NA	NA	0
C1_01670C_A	-0.167569	0.819761	-0.6
C1_01670C_B	-0.108887	0.919594	-0.3
C1_01680C_A	-0.0600212	0.953832	-0.2
C1_01680C_B	-0.191632	0.549662	-1.1
C1_01690C_A	0.0547905	0.887101	0.4
C1_01690C_B	0.0158777	0.986736	0.1
C1_01700W_A	-0.179557	0.733858	-0.8
C1_01700W_B	-0.072628	0.947385	-0.3
C1_01710W_A	-0.232887	0.624027	-1
C1_01710W_B	-0.0669294	0.95979	-0.2
C1_01720C_A	-0.0127067	0.994976	0
C1_01720C_B	-0.159515	0.835972	-0.6
C1_01730W_A	-0.00479658	NA	-0.1
C1_01730W_B	NA	NA	0
C1_01740W_A	-0.291739	0.0331646	-3
C1_01740W_B	-0.241746	0.126046	-2.2
C1_01750W_A	-0.3848	0.121888	-2.2
C1_01750W_B	-0.548667	0.00324875	-4.2
C1_01760W_A	0.00355435	0.997432	0
C1_01760W_B	-0.0027143	0.998097	0
C1_01770W_A	-0.0277037	0.993082	-0.1
C1_01770W_B	-0.072019	0.956197	-0.2
C1_01780C_A	0.33325	0.243918	1.8
C1_01780C_B	0.0520857	0.978391	0.1
C1_01790W_A	-0.15265	0.802623	-0.6
C1_01790W_B	-0.0967717	0.898607	-0.4
C1_01800W_A	0.21705	0.632742	1
C1_01800W_B	0.153078	0.841281	0.5
C1_01810C_A	-0.0229965	0.993289	-0.1
C1_01810C_B	0.361976	0.203507	1.9
C1_01820C_A	0.281596	0.4469	1.3
C1_01820C_B	0.0579337	0.968783	0.2
C1_01830C_A	-0.0123581	0.994976	0
C1_01830C_B	0.029979	0.992725	0.1
C1_01840C_A	-0.0706941	0.953832	-0.2
C1_01840C_B	0.177385	0.703101	0.8
C1_01850C_A	0.0584047	0.969295	0.2
C1_01850C_B	-0.0563616	0.970843	-0.2
C1_01860W_A	0.0778336	0.917426	0.3
C1_01860W_B	0.100795	0.889386	0.4
C1_01870C_A	0.0678724	0.867619	0.5
C1_01870C_B	0.0606766	0.8924	0.4
C1_01880C_A	-0.00203083	0.998657	0
C1_01880C_B	-0.150952	0.853574	-0.5
C1_01890C_A	0.0400011	0.985845	0.1
C1_01890C_B	-0.0713706	0.953832	-0.2
C1_01900C_A	-0.00346887	0.997432	0
C1_01900C_B	-0.0890071	0.939374	-0.3
C1_01910W_A	-0.0175241	0.993082	-0.1
C1_01910W_B	0.140065	0.672825	0.9
C1_01920W_A	0.139383	0.843259	0.5
C1_01920W_B	0.121485	0.872067	0.5
C1_01930W_A	0.178384	0.798916	0.7
C1_01930W_B	0.101925	0.926956	0.3
C1_01940C_A	0.0950541	0.9122	0.4
C1_01940C_B	0.180718	0.691154	0.9
C1_01950C_A	0.105397	0.911033	0.4
C1_01950C_B	0.0503136	0.975032	0.2
C1_01970W_A	NA	NA	0
C1_01970W_B	NA	NA	0
C1_01980W_A	0.0443621	0.984628	0.1
C1_01980W_B	-0.104192	0.899191	-0.4
C1_01990W_A	0.00100812	NA	0
C1_01990W_B	NA	NA	0
C1_02000W_A	-0.0730704	0.953349	-0.2
C1_02000W_B	-0.161144	0.797325	-0.7
C1_02010C_A	0.0930615	0.928432	0.3
C1_02010C_B	-0.203555	0.699797	-0.8
C1_02020W_A	0.228764	0.636306	1
C1_02020W_B	-0.032217	0.992137	-0.1
C1_02030C_A	-0.167893	0.813841	-0.6
C1_02030C_B	0.0993406	0.92151	0.3
C1_02040C_A	-0.133765	0.882514	-0.4
C1_02040C_B	0.0902039	0.942614	0.3
C1_02050C_A	-0.0208514	0.993082	-0.1
C1_02050C_B	-0.0642853	0.953832	-0.2
C1_02060W_A	0.379785	0.155426	2.1
C1_02060W_B	0.118796	0.899191	0.4
C1_02070W_A	-0.0311733	NA	-0.5
C1_02070W_B	-0.000313114	NA	0
C1_02080W_A	0.193465	0.738506	0.8
C1_02080W_B	0.175549	0.800776	0.6
C1_02090C_A	-0.187899	0.771468	-0.7
C1_02090C_B	0.135249	0.877779	0.5
C1_02100W_A	0.197107	0.672825	0.9
C1_02100W_B	-0.0496821	0.980114	-0.1
C1_02110C_A	-0.55659	0.00336422	-4.2
C1_02110C_B	-0.566735	0.000674686	-5
C1_02120C_A	-0.0816979	0.93971	-0.3
C1_02120C_B	0.12306	0.858594	0.5
C1_02130C_A	-0.0363239	0.990541	-0.1
C1_02130C_B	-0.0253237	0.993082	-0.1
C1_02140C_A	0.0307945	NA	0.5
C1_02140C_B	0.00938453	NA	0.1
C1_02150W_A	-0.0603489	0.960121	-0.2
C1_02150W_B	0.0612508	0.959563	0.2
C1_02160W_A	0.0701923	0.956305	0.2
C1_02160W_B	0.10663	0.919983	0.3
C1_02170C_A	0.096243	0.920184	0.3
C1_02170C_B	-0.0108594	0.994976	0
C1_02180W_A	0.0850879	0.947385	0.3
C1_02180W_B	0.194693	0.747398	0.7
C1_02190W_A	0.141101	0.866158	0.5
C1_02190W_B	-0.0431727	0.984656	-0.1
C1_02200C_A	-0.0156427	0.994976	0
C1_02200C_B	0.0464523	0.979975	0.1
C1_02210W_A	-0.116652	0.891823	-0.4
C1_02210W_B	0.111226	0.901847	0.4
C1_02220C_A	-0.0108161	0.994976	0
C1_02220C_B	0.157042	0.841956	0.5
C1_02230W_A	0.0512273	0.967658	0.2
C1_02230W_B	-0.0497722	0.971362	-0.2
C1_02240W_A	-0.0303601	0.985939	-0.1
C1_02240W_B	0.153136	0.729689	0.8
C1_02250W_A	-0.448616	0.0481078	-2.7
C1_02250W_B	-0.406916	0.0902543	-2.4
C1_02260C_A	-0.166806	0.664352	-0.9
C1_02260C_B	0.0362925	0.980114	0.1
C1_02270C_A	-0.239757	0.584148	-1.1
C1_02270C_B	-0.265801	0.455486	-1.3
C1_02280C_A	-0.0850209	0.947385	-0.3
C1_02280C_B	-0.108714	0.919983	-0.3
C1_02290C_A	-0.0832033	0.94394	-0.3
C1_02290C_B	-0.024714	0.993082	-0.1
C1_02300W_A	0.0693874	0.957388	0.2
C1_02300W_B	0.00960692	0.994976	0
C1_02310C_A	-0.143881	0.865683	-0.5
C1_02310C_B	-0.031744	0.992137	-0.1
C1_02320C_A	-0.0873567	0.933194	-0.3
C1_02320C_B	-0.132039	0.867619	-0.5
C1_02330C_A	-0.0222955	0.993082	-0.1
C1_02330C_B	-0.0395115	0.948789	-0.2
C1_02340C_A	-0.0491776	0.941231	-0.3
C1_02340C_B	0.0793106	0.8551	0.5
C1_02350W_A	-0.306218	0.320509	-1.6
C1_02350W_B	-0.178099	0.733858	-0.8
C1_02360C_A	0.0513257	0.954444	0.2
C1_02360C_B	-0.134207	0.793936	-0.7
C1_02370C_A	-0.376532	0.108625	-2.3
C1_02370C_B	-0.369823	0.124984	-2.2
C1_02380C_A	0.0327654	0.985845	0.1
C1_02380C_B	-0.0527083	0.963933	-0.2
C1_02390W_A	-0.142629	0.867619	-0.5
C1_02390W_B	0.00594133	0.996522	0
C1_02400C_A	0.0702687	0.954981	0.2
C1_02400C_B	-0.245337	0.602316	-1
C1_02410C_A	0.221837	0.617054	1
C1_02410C_B	0.0108626	0.994976	0
C1_02420C_A	-0.213406	0.158281	-2
C1_02420C_B	-0.291554	0.0168471	-3.3
C1_02430C_A	-0.0896408	0.853558	-0.5
C1_02430C_B	-0.0402047	0.95979	-0.2
C1_02440C_A	0.0933305	0.93971	0.3
C1_02440C_B	0.191658	0.759265	0.7
C1_02450C_A	0.153661	0.798916	0.7
C1_02450C_B	-0.0132283	0.994976	0
C1_02460W_A	0.164934	0.00360629	4.1
C1_02460W_B	0.176781	0.000779415	4.9
C1_02470W_A	0.0487174	0.979749	0.1
C1_02470W_B	0.0427092	0.984656	0.1
C1_02480W_A	0.0539186	0.94018	0.3
C1_02480W_B	-0.13803	0.721648	-0.8
C1_02490C_A	-0.215193	0.683751	-0.9
C1_02490C_B	-0.0404362	0.985845	-0.1
C1_02500W_A	0.216579	0.678483	0.9
C1_02500W_B	0.12597	0.888886	0.4
C1_02510W_A	-0.079587	0.952619	-0.2
C1_02510W_B	0.0538567	0.97547	0.1
C1_02520W_A	NA	NA	0
C1_02520W_B	-0.0275394	NA	-0.5
C1_02530C_A	-0.263462	0.124984	-2.2
C1_02530C_B	-0.125782	0.70628	-0.8
C1_02540C_A	NA	NA	0
C1_02540C_B	-9.69455e-05	NA	0
C1_02560W_A	-0.0811003	NA	-0.9
C1_02560W_B	-0.0576707	NA	-0.4
C1_02570C_A	-0.040008	0.972121	-0.2
C1_02570C_B	-0.0854369	0.912579	-0.4
C1_02580W_A	-0.000764843	NA	0
C1_02580W_B	-0.00736682	NA	-0.1
C1_02590C_A	-0.997378	8.51612e-23	-24.9
C1_02590C_B	-0.870963	7.46857e-19	-20.8
C1_02600W_A	-0.465014	0.021134	-3.2
C1_02600W_B	-0.351596	0.145827	-2.1
C1_02610W_A	-0.0539067	0.967658	-0.2
C1_02610W_B	-0.195319	0.670213	-0.9
C1_02620C_A	-0.0799926	0.819903	-0.6
C1_02620C_B	-0.0821345	0.811228	-0.6
C1_02630C_A	-0.126257	0.890129	-0.4
C1_02630C_B	0.0171489	0.994976	0
C1_02640C_A	0.168187	0.406139	1.4
C1_02640C_B	0.118571	0.69166	0.9
C1_02650W_A	0.00216299	0.997432	0
C1_02650W_B	0.0410974	0.957642	0.2
C1_02660C_A	0.248268	0.458554	1.3
C1_02660C_B	-0.00120627	0.999089	0
C1_02670C_A	0.0430098	NA	0.3
C1_02670C_B	-0.00016341	NA	0
C1_02680C_A	-0.186946	0.705713	-0.8
C1_02680C_B	0.161324	0.811228	0.6
C1_02690C_A	-0.0104958	NA	-0.2
C1_02690C_B	-0.0104958	NA	-0.2
C1_02700C_A	-0.0835213	0.947217	-0.3
C1_02700C_B	0.0414465	0.984628	0.1
C1_02710W_A	-0.132987	0.462096	-1.3
C1_02710W_B	-0.0232455	0.981151	-0.1
C1_02720W_A	-0.0144125	0.994976	0
C1_02720W_B	0.100732	0.924435	0.3
C1_02730W_A	0.148248	0.811228	0.6
C1_02730W_B	0.080677	0.947385	0.3
C1_02740C_A	-0.0372819	0.985845	-0.1
C1_02740C_B	0.0679744	0.95952	0.2
C1_02750C_A	-0.0601913	0.947385	-0.3
C1_02750C_B	0.0575406	0.946172	0.3
C1_02760W_A	-0.0257833	0.982265	-0.1
C1_02760W_B	0.00474181	0.99523	0
C1_02770W_A	0.064411	0.95404	0.2
C1_02770W_B	0.131564	0.844164	0.5
C1_02780W_A	0.190601	0.608733	1
C1_02780W_B	-0.053918	0.957388	-0.2
C1_02790W_A	0.0440968	0.927194	0.3
C1_02790W_B	0.00976041	0.993289	0.1
C1_02800W_A	0.0680866	NA	0.7
C1_02800W_B	-0.0156414	NA	-0.1
C1_02810W_A	0.0257021	0.993082	0.1
C1_02810W_B	-0.32666	0.229903	-1.8
C1_02820W_A	-0.384947	0.00588176	-3.9
C1_02820W_B	-0.561318	6.87762e-07	-8.3
C1_02830W_A	0.0033577	0.997432	0
C1_02830W_B	-0.132076	0.872783	-0.5
C1_02840W_A	-0.296534	0.350565	-1.5
C1_02840W_B	-0.0943937	0.929705	-0.3
C1_02850W_A	-0.339508	0.136323	-2.1
C1_02850W_B	-0.118252	0.871051	-0.5
C1_02860C_A	0.221689	0.548405	1.1
C1_02860C_B	0.208456	0.608169	1
C1_02870W_A	0.117853	0.890129	0.4
C1_02870W_B	0.126298	0.875442	0.5
C1_02880C_A	-0.13577	0.719156	-0.8
C1_02880C_B	-0.195166	0.361517	-1.5
C1_02890C_A	-0.043587	0.985845	-0.1
C1_02890C_B	0.190146	0.759265	0.7
C1_02900C_A	0.014583	0.994976	0
C1_02900C_B	0.162437	0.810413	0.6
C1_02910C_A	0.0246211	0.993082	0.1
C1_02910C_B	0.0925576	0.934035	0.3
C1_02920W_A	0.0925816	0.902369	0.4
C1_02920W_B	0.0606555	0.953832	0.2
C1_02930C_A	-0.00968481	0.994976	0
C1_02930C_B	-0.272346	0.406829	-1.4
C1_02940C_A	0.147722	0.844164	0.5
C1_02940C_B	0.064524	0.961765	0.2
C1_02950W_A	-0.033685	0.981391	-0.1
C1_02950W_B	0.077901	0.939087	0.3
C1_02960C_A	0.144342	0.805256	0.6
C1_02960C_B	0.138851	0.829491	0.6
C1_02970W_A	-0.245565	0.0771723	-2.5
C1_02970W_B	-0.268857	0.0481078	-2.7
C1_02980W_A	-0.207086	0.700792	-0.8
C1_02980W_B	-0.19522	0.680556	-0.9
C1_02990C_A	0.379602	0.164412	2
C1_02990C_B	-0.0434004	0.985845	-0.1
C1_03000W_A	-0.101759	0.921085	-0.3
C1_03000W_B	-0.00814333	0.994976	0
C1_03010W_A	0.125306	0.0867717	2.4
C1_03010W_B	0.14878	0.0177942	3.3
C1_03020C_A	0.104201	0.232369	1.8
C1_03020C_B	0.113207	0.0793514	2.5
C1_03030W_A	0.132655	0.076141	2.5
C1_03030W_B	0.117813	0.206111	1.9
C1_03040W_A	-0.113344	0.906192	-0.4
C1_03040W_B	-0.169967	0.809359	-0.6
C1_03050W_A	-0.0447209	0.981847	-0.1
C1_03050W_B	0.0775814	0.953832	0.2
C1_03060C_A	-0.0666252	0.94297	-0.3
C1_03060C_B	-0.00278236	0.997432	0
C1_03070C_A	-0.0480188	0.967658	-0.2
C1_03070C_B	-0.125604	0.862504	-0.5
C1_03080C_A	0.321265	0.318608	1.6
C1_03080C_B	0.301139	0.37519	1.4
C1_03090W_A	0.101561	0.156947	2.1
C1_03090W_B	0.110832	0.0926198	2.4
C1_03100W_A	0.0148055	0.99309	0.1
C1_03100W_B	-0.0047075	0.995986	0
C1_03110W_A	0.126359	0.0692325	2.5
C1_03110W_B	0.172747	0.00123433	4.7
C1_03120W_A	0.0016824	0.998696	0
C1_03120W_B	0.230522	0.616576	1
C1_03130C_A	-0.0478483	0.958866	-0.2
C1_03130C_B	0.0439077	0.967658	0.2
C1_03140W_A	0.113367	0.883741	0.4
C1_03140W_B	-0.10515	0.907813	-0.4
C1_03150C_A	0.517089	0.00700108	3.8
C1_03150C_B	0.313714	0.313241	1.6
C1_03160C_A	0.04501	0.97547	0.1
C1_03160C_B	-0.138478	0.826585	-0.6
C1_03170C_A	0.175763	0.763532	0.7
C1_03170C_B	0.0992356	0.898161	0.4
C1_03180W_A	0.075567	0.954444	0.2
C1_03180W_B	-0.0160233	0.994976	0
C1_03190C_A	0.00120413	0.997432	0
C1_03190C_B	0.0116575	0.990658	0.1
C1_03200C_A	-0.0481194	0.981847	-0.1
C1_03200C_B	0.0181805	0.994901	0
C1_03210C_A	-0.0907466	0.852961	-0.5
C1_03210C_B	-0.123218	0.752001	-0.7
C1_03220C_A	0.13889	0.1533	2.1
C1_03220C_B	0.14282	0.120541	2.2
C1_03230C_A	-0.0755819	0.890743	-0.4
C1_03230C_B	-0.035567	0.965391	-0.2
C1_03240W_A	0.280387	0.280228	1.7
C1_03240W_B	0.285763	0.256895	1.7
C1_03250C_A	0.0887261	0.94297	0.3
C1_03250C_B	0.141852	0.867889	0.5
C1_03260W_A	0.0873762	0.947217	0.3
C1_03260W_B	0.0331957	0.992137	0.1
C1_03270W_A	-0.00976009	0.994976	0
C1_03270W_B	-0.124522	0.867933	-0.5
C1_03280W_A	0.200421	0.311809	1.6
C1_03280W_B	0.0209123	0.992137	0.1
C1_03290W_A	-0.0248356	0.993082	-0.1
C1_03290W_B	0.0985751	0.921046	0.3
C1_03300C_A	-0.283504	0.190644	-1.9
C1_03300C_B	-0.288744	0.172629	-2
C1_03310W_A	0.343778	0.0430955	2.8
C1_03310W_B	0.121004	0.841244	0.5
C1_03320C_A	0.015212	0.994428	0.1
C1_03320C_B	-0.0821319	0.937684	-0.3
C1_03330C_A	-0.0184446	0.994713	0
C1_03330C_B	-0.00243467	0.998174	0
C1_03340C_A	0.195802	0.488249	1.2
C1_03340C_B	0.137675	0.761017	0.7
C1_03350C_A	-0.00111575	0.998121	0
C1_03350C_B	-0.110539	0.63565	-1
C1_03360W_A	-0.201004	0.453122	-1.3
C1_03360W_B	-0.101929	0.867619	-0.5
C1_03370W_A	-0.11319	0.202037	-1.9
C1_03370W_B	-0.145862	0.0605138	-2.6
C1_03380W_A	-0.196989	0.40343	-1.4
C1_03380W_B	-0.0883879	0.900083	-0.4
C1_03390W_A	0.0138256	0.994713	0
C1_03390W_B	0.0397389	0.979749	0.1
C1_03400W_A	-0.1427	0.838554	-0.6
C1_03400W_B	0.0017545	0.998671	0
C1_03410W_A	-0.0497693	0.980546	-0.1
C1_03410W_B	-0.00021639	0.999997	0
C1_03420W_A	0.0114392	NA	0.2
C1_03420W_B	NA	NA	0
C1_03430W_A	0.246679	0.595772	1
C1_03430W_B	-0.0485339	0.980497	-0.1
C1_03440C_A	0.0695512	0.928432	0.3
C1_03440C_B	-0.00766701	0.994976	0
C1_03450C_A	0.0683224	0.956197	0.2
C1_03450C_B	0.0436721	0.980114	0.1
C1_03460C_A	-0.0960502	0.928432	-0.3
C1_03460C_B	-0.154584	0.826234	-0.6
C1_03470C_A	-0.0245993	NA	-0.4
C1_03470C_B	0.00507447	NA	0.1
C1_03480C_A	0.00432333	0.997022	0
C1_03480C_B	-0.0311702	0.991385	-0.1
C1_03490W_A	0.0488792	0.967072	0.2
C1_03490W_B	0.0527251	0.963933	0.2
C1_03500W_A	0.0908122	0.840424	0.6
C1_03500W_B	0.106863	0.793313	0.7
C1_03510C_A	-0.0392212	0.967072	-0.2
C1_03510C_B	-0.120433	0.779463	-0.7
C1_03520W_A	0.241353	0.0873609	2.4
C1_03520W_B	0.13228	0.677988	0.9
C1_03530W_A	-0.113689	0.899191	-0.4
C1_03530W_B	-0.000343132	0.999799	0
C1_03540C_A	0.0634202	0.960037	0.2
C1_03540C_B	-0.014619	0.994976	0
C1_03550C_A	-0.147567	0.682213	-0.9
C1_03550C_B	-0.170223	0.618802	-1
C1_03560C_A	-0.0959983	0.867889	-0.5
C1_03560C_B	-0.0475894	0.959544	-0.2
C1_03570C_A	NA	NA	0
C1_03570C_B	-0.00479658	NA	-0.1
C1_03580W_A	NA	NA	0
C1_03580W_B	NA	NA	0
C1_03600W_A	0.10576	0.87252	0.5
C1_03600W_B	0.0465694	0.967849	0.2
C1_03610C_A	0.0727232	0.956197	0.2
C1_03610C_B	-0.0398963	0.985939	-0.1
C1_03620C_A	-0.101526	0.650695	-0.9
C1_03620C_B	-0.0865816	0.87252	-0.5
C1_03630W_A	0.0537342	0.97547	0.2
C1_03630W_B	0.00536121	0.996522	0
C1_03640C_A	0.0694368	0.957642	0.2
C1_03640C_B	0.237062	0.602316	1
C1_03650C_A	0.0155787	0.993082	0.1
C1_03650C_B	0.0374342	0.974702	0.2
C1_03660W_A	-0.0798878	0.951034	-0.2
C1_03660W_B	0.0826527	0.947385	0.3
C1_03670C_A	-0.19953	0.646347	-0.9
C1_03670C_B	-0.0766402	0.947217	-0.3
C1_03680W_A	-0.0925949	0.869862	-0.5
C1_03680W_B	0.12879	0.695535	0.8
C1_03690W_A	0.0062825	0.996291	0
C1_03690W_B	0.157675	0.793936	0.7
C1_03700C_A	0.00877757	NA	0.1
C1_03700C_B	NA	NA	0
C1_03710C_A	-0.256519	0.44741	-1.3
C1_03710C_B	-0.194884	0.686997	-0.9
C1_03720C_A	-0.109891	0.90541	-0.4
C1_03720C_B	-0.206453	0.686997	-0.9
C1_03730C_A	0.10634	0.887933	0.4
C1_03730C_B	-0.0201456	0.993082	-0.1
C1_03740W_A	-0.113361	0.910356	-0.4
C1_03740W_B	-0.0979888	0.929705	-0.3
C1_03750W_A	0.33419	0.227315	1.8
C1_03750W_B	-0.012094	0.994976	0
C1_03760C_A	-0.0195252	0.993082	-0.1
C1_03760C_B	-0.15059	0.786694	-0.7
C1_03770W_A	-0.145407	0.858594	-0.5
C1_03770W_B	-0.0617846	0.96326	-0.2
C1_03780C_A	0.0178206	0.992137	0.1
C1_03780C_B	-0.0627944	0.924107	-0.3
C1_03790C_A	0.101423	0.74018	0.8
C1_03790C_B	0.0507199	0.905734	0.4
C1_03800W_A	-0.179839	0.764006	-0.7
C1_03800W_B	0.0837096	0.948789	0.2
C1_03810C_A	0.141028	0.868682	0.5
C1_03810C_B	0.163304	0.826585	0.6
C1_03820W_A	0.090378	0.942614	0.3
C1_03820W_B	0.0347482	0.991385	0.1
C1_03830C_A	0.10342	0.902369	0.4
C1_03830C_B	-0.131079	0.862504	-0.5
C1_03840W_A	0.0521491	0.978391	0.1
C1_03840W_B	-0.109143	0.907718	-0.4
C1_03860C_A	0.0305913	0.992137	0.1
C1_03860C_B	0.0690967	0.957388	0.2
C1_03870C_A	-0.569238	0.00454909	-4
C1_03870C_B	-0.578648	0.00363555	-4.1
C1_03880C_A	NA	NA	0
C1_03880C_B	NA	NA	0
C1_03890W_A	0.0305791	NA	0.5
C1_03890W_B	NA	NA	0
C1_03900W_A	0.0356042	0.989886	0.1
C1_03900W_B	-0.098915	0.926578	-0.3
C1_03910C_A	-0.0242071	0.993082	-0.1
C1_03910C_B	-0.239731	0.617054	-1
C1_03920C_A	-0.0562674	0.967658	-0.2
C1_03920C_B	-0.170602	0.77516	-0.7
C1_03930W_A	-0.0414291	0.985845	-0.1
C1_03930W_B	0.143436	0.867619	0.5
C1_03940W_A	-0.157682	0.446666	-1.3
C1_03940W_B	0.00490993	0.994976	0
C1_03950C_A	-0.0652886	0.95384	-0.2
C1_03950C_B	0.0108065	0.994976	0
C1_03960C_A	0.0882539	0.946172	0.3
C1_03960C_B	0.0660466	0.961765	0.2
C1_03970W_A	0.0144371	NA	0.2
C1_03970W_B	-0.00704555	0.994976	0
C1_03980W_A	0.00687558	0.994976	0
C1_03980W_B	0.145105	0.786694	0.7
C1_03990W_A	0.00309877	0.997447	0
C1_03990W_B	-0.00520017	0.996522	0
C1_04000C_A	-0.0784011	0.953832	-0.2
C1_04000C_B	-0.0823457	0.951323	-0.2
C1_04010C_A	-0.0925573	0.887933	-0.4
C1_04010C_B	-0.0568635	0.952092	-0.2
C1_04020C_A	0.633427	0.000139812	5.7
C1_04020C_B	0.438549	0.00573437	3.9
C1_04030W_A	-0.0266129	0.993082	-0.1
C1_04030W_B	-0.0178337	0.994713	0
C1_04040C_A	0.0604349	0.948789	0.2
C1_04040C_B	-0.0186036	0.993082	-0.1
C1_04050C_A	NA	NA	0
C1_04050C_B	NA	NA	0
C1_04060W_A	-0.0635319	0.95449	-0.2
C1_04060W_B	-0.127077	0.867619	-0.5
C1_04070C_A	-0.0480345	0.963933	-0.2
C1_04070C_B	-0.068139	0.953832	-0.2
C1_04080W_A	-0.00974505	0.994976	0
C1_04080W_B	0.207431	0.672041	0.9
C1_04090C_A	0.127524	0.875126	0.5
C1_04090C_B	0.0656791	0.961765	0.2
C1_04100C_A	0.00404334	0.994976	0
C1_04100C_B	-0.0127691	0.992137	-0.1
C1_04110W_A	0.0922747	0.924435	0.3
C1_04110W_B	-0.00029399	0.999799	0
C1_04120C_A	0.050433	0.980114	0.1
C1_04120C_B	-0.0146094	0.994976	0
C1_04130W_A	0.0586195	0.947385	0.3
C1_04130W_B	0.0345618	0.977325	0.1
C1_04140W_A	0.310358	0.355953	1.5
C1_04140W_B	0.0877956	0.889795	0.4
C1_04150C_A	0.299906	0.256119	1.7
C1_04150C_B	0.0130464	0.994976	0
C1_04160C_A	0.236078	0.406829	1.4
C1_04160C_B	0.0330839	0.985939	0.1
C1_04170C_A	0.31853	2.47067e-06	7.7
C1_04170C_B	0.293122	2.3648e-05	6.6
C1_04180W_A	0.290961	0.000128838	5.8
C1_04180W_B	0.377578	2.15517e-06	7.7
C1_04190C_A	-0.0241493	0.993082	-0.1
C1_04190C_B	-0.0392998	0.985845	-0.1
C1_04200C_A	0.0555632	0.973524	0.2
C1_04200C_B	-0.00160489	0.998696	0
C1_04210C_A	-0.108145	0.779448	-0.7
C1_04210C_B	0.0499805	0.947385	0.3
C1_04220C_A	-0.0150922	0.994976	0
C1_04220C_B	0.154988	0.844164	0.5
C1_04230W_A	0.0937895	0.888331	0.4
C1_04230W_B	0.102358	0.884564	0.4
C1_04240C_A	0.26862	0.00110988	4.7
C1_04240C_B	0.334991	2.89578e-06	7.6
C1_04250C_A	-0.00838319	NA	0
C1_04250C_B	-0.0135435	0.993082	-0.1
C1_04260W_A	0.27161	0.000122862	5.8
C1_04260W_B	0.313982	1.1022e-05	7
C1_04270C_A	0.0603847	NA	0.8
C1_04270C_B	0.0264826	NA	0.2
C1_04280C_A	-0.0515069	0.973805	-0.2
C1_04280C_B	0.0218193	0.993082	0.1
C1_04290C_A	-0.200123	0.00153704	-4.6
C1_04290C_B	-0.163687	0.0359258	-2.9
C1_04300C_A	-0.0299882	0.926445	-0.3
C1_04300C_B	-0.0353418	0.900083	-0.4
C1_04310C_A	0.112983	0.865009	0.5
C1_04310C_B	0.179325	0.706645	0.8
C1_04320W_A	0.0603555	0.963933	0.2
C1_04320W_B	0.156151	0.809963	0.6
C1_04330W_A	-0.146913	0.837501	-0.6
C1_04330W_B	0.0367631	0.985845	0.1
C1_04340C_A	0.160709	0.813825	0.6
C1_04340C_B	-0.0267823	0.993082	-0.1
C1_04350C_A	0.0560192	0.953832	0.2
C1_04350C_B	0.0264344	0.992762	0.1
C1_04360C_A	-0.0834939	0.809883	-0.6
C1_04360C_B	-0.103534	0.737257	-0.8
C1_04370C_A	0.161567	0.700792	0.8
C1_04370C_B	-0.00982868	0.994976	0
C1_04380W_A	0.0909961	0.921085	0.3
C1_04380W_B	0.192993	0.661112	0.9
C1_04390C_A	-0.00630579	0.994976	0
C1_04390C_B	0.020083	0.990658	0.1
C1_04400C_A	-0.207443	0.00624951	-3.8
C1_04400C_B	-0.139894	0.17965	-2
C1_04410C_A	0.113648	0.868724	0.5
C1_04410C_B	0.055313	0.958402	0.2
C1_04420C_A	0.00485924	0.99523	0
C1_04420C_B	0.0613081	0.930625	0.3
C1_04430C_A	-0.103136	0.92151	-0.3
C1_04430C_B	-0.100156	0.928432	-0.3
C1_04440W_A	-0.102331	0.924107	-0.3
C1_04440W_B	-0.064617	0.953832	-0.2
C1_04450C_A	-0.0456664	0.962693	-0.2
C1_04450C_B	-0.166391	0.405718	-1.4
C1_04460C_A	-0.205021	0.559292	-1.1
C1_04460C_B	-0.0767953	0.93971	-0.3
C1_04470C_A	-0.172191	0.763532	-0.7
C1_04470C_B	0.0586502	0.965754	0.2
C1_04480C_A	-0.324681	0.256914	-1.7
C1_04480C_B	-0.0359053	0.989491	-0.1
C1_04490W_A	0.0609214	0.948789	0.2
C1_04490W_B	-0.0315766	0.985845	-0.1
C1_04500W_A	-0.202051	0.223617	-1.8
C1_04500W_B	-0.31033	0.0944695	-2.4
C1_04510W_A	-0.177417	0.798916	-0.7
C1_04510W_B	0.242922	0.597712	1
C1_04520C_A	0.146177	0.765929	0.7
C1_04520C_B	0.0721753	0.937684	0.3
C1_04530C_A	0.0341425	0.990541	0.1
C1_04530C_B	0.114405	0.898161	0.4
C1_04540C_A	0.0493522	0.978391	0.1
C1_04540C_B	0.198184	0.721648	0.8
C1_04550W_A	0.0636554	0.96326	0.2
C1_04550W_B	0.0492399	0.981141	0.1
C1_04560W_A	-0.0874647	0.942614	-0.3
C1_04560W_B	0.118662	0.891152	0.4
C1_04570C_A	0.324223	0.285164	1.7
C1_04570C_B	-0.0163123	0.994976	0
C1_04580C_A	0.0261189	0.993082	0.1
C1_04580C_B	-0.132651	0.883578	-0.4
C1_04590W_A	0.210528	0.43977	1.3
C1_04590W_B	0.292627	0.181511	2
C1_04600C_A	0.00868283	0.994976	0
C1_04600C_B	-0.0316373	0.982265	-0.1
C1_04610W_A	-0.125991	0.137568	-2.1
C1_04610W_B	-0.11419	0.206111	-1.9
C1_04620W_A	-0.0483506	0.969194	-0.2
C1_04620W_B	-0.223035	0.484983	-1.2
C1_04630C_A	-0.170369	0.802058	-0.6
C1_04630C_B	-0.210467	0.672825	-0.9
C1_04640W_A	-0.0721394	0.954444	-0.2
C1_04640W_B	-0.037212	0.989843	-0.1
C1_04650W_A	-0.0117126	0.975255	-0.2
C1_04650W_B	-0.0782639	0.887661	-0.4
C1_04660W_A	-0.703796	0.000122862	-5.8
C1_04660W_B	-0.392332	0.132864	-2.2
C1_04670W_A	-0.0956155	0.920453	-0.3
C1_04670W_B	0.0537088	0.963933	0.2
C1_04680W_A	0.234253	0.00322873	4.2
C1_04680W_B	0.182224	0.041723	2.8
C1_04690C_A	-0.034532	NA	-0.6
C1_04690C_B	0.00825177	NA	0.1
C1_04700C_A	0.103711	0.919789	0.3
C1_04700C_B	-0.05996	0.967658	-0.2
C1_04710C_A	-0.0103689	0.994976	0
C1_04710C_B	0.00401263	0.997432	0
C1_04720W_A	-0.0225591	0.993289	-0.1
C1_04720W_B	-0.00282738	0.997809	0
C1_04730C_A	-0.0590389	0.936423	-0.3
C1_04730C_B	0.107403	0.800776	0.6
C1_04740W_A	0.069366	0.958866	0.2
C1_04740W_B	-0.0431866	0.984656	-0.1
C1_04750W_A	0.304099	0.311219	1.6
C1_04750W_B	0.273323	0.401368	1.4
C1_04760C_A	-0.0347008	0.991948	-0.1
C1_04760C_B	0.0945917	0.93317	0.3
C1_04770C_A	-0.0551092	0.964066	-0.2
C1_04770C_B	-0.0216093	0.993136	-0.1
C1_04780C_A	0.0525529	0.975679	0.1
C1_04780C_B	0.097576	0.928432	0.3
C1_04790W_A	0.041996	0.982265	0.1
C1_04790W_B	0.134961	0.865683	0.5
C1_04800C_A	-0.0197923	NA	-0.2
C1_04800C_B	0.0175609	NA	0.2
C1_04810W_A	0.0671505	0.959386	0.2
C1_04810W_B	-0.354135	0.204522	-1.9
C1_04820C_A	-0.0184952	0.994713	0
C1_04820C_B	0.12848	0.87386	0.5
C1_04830W_A	-0.0450606	0.95384	-0.2
C1_04830W_B	-0.153015	0.564163	-1.1
C1_04840C_A	0.0836728	0.948298	0.2
C1_04840C_B	0.277051	0.482413	1.2
C1_04850C_A	0.170081	0.729761	0.8
C1_04850C_B	0.00158471	0.998696	0
C1_04860W_A	0.0837938	0.934035	0.3
C1_04860W_B	0.0910119	0.929705	0.3
C1_04870W_A	0.108913	0.826585	0.6
C1_04870W_B	0.0180831	0.993082	0.1
C1_04880C_A	0.10334	0.898886	0.4
C1_04880C_B	-0.0906062	0.92151	-0.3
C1_04890W_A	0.0404436	0.926578	0.3
C1_04890W_B	0.123254	0.358051	1.5
C1_04900W_A	0.0798224	0.953832	0.2
C1_04900W_B	0.0473082	0.982265	0.1
C1_04910C_A	0.105169	0.902946	0.4
C1_04910C_B	0.173457	0.769251	0.7
C1_04930C_A	-0.0886322	0.806271	-0.6
C1_04930C_B	-0.0363262	NA	-0.3
C1_04940C_A	0.0469949	NA	0.3
C1_04940C_B	-0.00961725	NA	-0.1
C1_04950C_A	-0.0135065	0.994976	0
C1_04950C_B	0.00880397	0.994976	0
C1_04960C_A	0.0514194	0.979749	0.1
C1_04960C_B	0.0579211	0.970282	0.2
C1_04970W_A	-0.154606	0.738506	-0.8
C1_04970W_B	-0.186612	0.577834	-1.1
C1_04980C_A	-0.181351	0.695535	-0.8
C1_04980C_B	-0.0903385	0.92151	-0.3
C1_04990C_A	-0.0102534	0.994976	0
C1_04990C_B	-0.0186823	0.994428	0
C1_05000W_A	-0.138077	0.729492	-0.8
C1_05000W_B	-0.0392555	0.97547	-0.2
C1_05010C_A	-0.0654403	0.961765	-0.2
C1_05010C_B	0.00702724	0.996522	0
C1_05020C_A	-0.178521	0.797325	-0.7
C1_05020C_B	-0.0435231	0.985845	-0.1
C1_05030C_A	-0.0566922	0.969194	-0.2
C1_05030C_B	-0.117973	0.902946	-0.4
C1_05050C_A	-0.0304651	0.98442	-0.1
C1_05050C_B	-0.0355617	0.981847	-0.1
C1_05060W_A	-0.0331921	0.984628	-0.1
C1_05060W_B	0.119873	0.802623	0.6
C1_05070C_A	-0.0817835	0.950418	-0.2
C1_05070C_B	-0.100261	0.924107	-0.3
C1_05080W_A	-0.146351	0.776994	-0.7
C1_05080W_B	0.0076406	0.994976	0
C1_05090W_A	0.1789	0.793313	0.7
C1_05090W_B	0.120382	0.898607	0.4
C1_05100W_A	0.0852984	0.946172	0.3
C1_05100W_B	-0.0680161	0.957388	-0.2
C1_05110C_A	-0.150311	0.173974	-2
C1_05110C_B	-0.12977	0.230173	-1.8
C1_05120W_A	-0.0777415	0.953832	-0.2
C1_05120W_B	-0.234833	0.624027	-1
C1_05130W_A	NA	NA	0
C1_05130W_B	NA	NA	0
C1_05140W_A	0.180402	0.602316	1
C1_05140W_B	-0.0665199	0.90543	-0.4
C1_05150C_A	0.00507447	NA	0.1
C1_05150C_B	-0.0104958	NA	-0.2
C1_05160C_A	0.151333	0.850284	0.5
C1_05160C_B	-0.142428	0.865683	-0.5
C1_05170C_A	0.0302602	0.985939	0.1
C1_05170C_B	0.0666757	0.948789	0.2
C1_05180C_A	0.212344	0.641389	0.9
C1_05180C_B	0.028407	0.992137	0.1
C1_05190C_A	-0.0193634	0.993289	-0.1
C1_05190C_B	-0.140251	0.836338	-0.6
C1_05200C_A	0.11225	0.912493	0.4
C1_05200C_B	-0.18273	0.789732	-0.7
C1_05210C_A	0.145187	0.695535	0.8
C1_05210C_B	0.183047	0.512503	1.2
C1_05220C_A	-0.0428512	0.979749	-0.1
C1_05220C_B	-0.30952	0.272927	-1.7
C1_05230W_A	-0.224311	0.608169	-1
C1_05230W_B	-0.177524	0.773385	-0.7
C1_05240C_A	0.00939737	0.994976	0
C1_05240C_B	0.223242	0.312382	1.6
C1_05250W_A	0.0497992	0.973805	0.2
C1_05250W_B	0.0676139	0.95404	0.2
C1_05260C_A	-0.0340116	0.990658	-0.1
C1_05260C_B	0.0508709	0.97547	0.2
C1_05270C_A	0.0258007	0.992137	0.1
C1_05270C_B	0.076555	0.923752	0.3
C1_05280W_A	-0.0345265	0.992137	-0.1
C1_05280W_B	-0.0505591	0.979975	-0.1
C1_05290W_A	-0.0508296	0.916497	-0.3
C1_05290W_B	-0.127365	0.38041	-1.4
C1_05300C_A	-0.390069	0.0075646	-3.7
C1_05300C_B	-0.382894	0.0258563	-3.1
C1_05310W_A	-0.013238	NA	-0.2
C1_05310W_B	NA	NA	0
C1_05320C_A	0.122175	0.898607	0.4
C1_05320C_B	0.0686927	0.95979	0.2
C1_05330C_A	0.149294	0.858594	0.5
C1_05330C_B	-0.10912	0.919594	-0.3
C1_05340C_A	-0.0395327	0.985845	-0.1
C1_05340C_B	0.00979012	0.994976	0
C1_05350W_A	-0.025113	0.993082	-0.1
C1_05350W_B	-0.0570284	0.967658	-0.2
C1_05360C_A	0.0172982	0.993651	0.1
C1_05360C_B	0.176348	0.695613	0.8
C1_05370C_A	0.120965	0.885782	0.4
C1_05370C_B	-0.0198894	0.994428	-0.1
C1_05380C_A	0.120005	0.890129	0.4
C1_05380C_B	-0.156702	0.811228	-0.6
C1_05390C_A	0.117578	0.867619	0.5
C1_05390C_B	-0.135206	0.862504	-0.5
C1_05400C_A	-0.0284626	0.993082	-0.1
C1_05400C_B	0.153585	0.846005	0.5
C1_05410C_A	0.190042	0.626632	1
C1_05410C_B	0.232132	0.382798	1.4
C1_05420W_A	-0.057358	0.968432	-0.2
C1_05420W_B	-0.0770152	0.95315	-0.2
C1_05430W_A	-0.0520342	0.97547	-0.1
C1_05430W_B	-0.00855102	0.994976	0
C1_05440C_A	-0.0646362	NA	-0.5
C1_05440C_B	-0.0432166	0.956197	-0.2
C1_05450W_A	-0.0214529	NA	-0.3
C1_05450W_B	0.0102203	NA	0.1
C1_05460W_A	-0.0516938	0.973642	-0.2
C1_05460W_B	-0.110242	0.889386	-0.4
C1_05470W_A	-0.146943	0.86106	-0.5
C1_05470W_B	-0.0226995	0.993289	-0.1
C1_05480C_A	-0.0751291	0.889386	-0.4
C1_05480C_B	0.111627	0.793936	0.7
C1_05490C_A	0.0599835	0.953832	0.2
C1_05490C_B	-0.0501278	0.964158	-0.2
C1_05500W_A	0.0535889	0.969194	0.2
C1_05500W_B	-0.304832	0.255681	-1.7
C1_05510C_A	0.177443	0.798428	0.7
C1_05510C_B	0.00786814	0.995401	0
C1_05520W_A	-0.0334031	0.986443	-0.1
C1_05520W_B	0.141261	0.841244	0.5
C1_05530C_A	0.0573897	0.953832	0.2
C1_05530C_B	0.0352177	0.982265	0.1
C1_05540C_A	-0.0396724	0.985939	-0.1
C1_05540C_B	0.280727	0.464009	1.3
C1_05550C_A	0.00507447	NA	0.1
C1_05550C_B	0.00507447	NA	0.1
C1_05560W_A	0.0500761	0.959386	0.2
C1_05560W_B	0.200266	0.585577	1
C1_05570W_A	0.0120213	NA	0.2
C1_05570W_B	NA	NA	0
C1_05580W_A	-0.0247782	NA	-0.4
C1_05580W_B	-0.00479658	NA	-0.1
C1_05590W_A	NA	NA	0
C1_05590W_B	0.00507447	NA	0.1
C1_05600W_A	-0.0265168	0.993082	-0.1
C1_05600W_B	0.257832	0.551768	1.1
C1_05610W_A	0.145192	0.85536	0.5
C1_05610W_B	-0.164442	0.819798	-0.6
C1_05620C_A	-0.0102485	0.994976	0
C1_05620C_B	-0.0494203	0.974168	-0.2
C1_05630C_A	-0.111163	0.554225	-1.1
C1_05630C_B	-0.0594177	0.865902	-0.5
C1_05640C_A	0.0130131	0.994976	0
C1_05640C_B	0.0581475	0.96326	0.2
C1_05650W_A	0.0700034	0.957642	0.2
C1_05650W_B	0.151318	0.850186	0.5
C1_05660C_A	-0.173698	0.49367	-1.2
C1_05660C_B	-0.175301	0.480877	-1.2
C1_05670W_A	-0.0495819	0.961765	-0.2
C1_05670W_B	-0.0920499	0.904023	-0.4
C1_05680C_A	0.145974	0.691771	0.9
C1_05680C_B	0.133217	0.738506	0.8
C1_05690C_A	0.0120213	NA	0.2
C1_05690C_B	-0.0119396	NA	-0.2
C1_05700W_A	-0.0112133	0.994976	0
C1_05700W_B	-0.00579242	0.996522	0
C1_05710C_A	0.0720499	0.939087	0.3
C1_05710C_B	-0.119153	0.862504	-0.5
C1_05720W_A	0.0250563	0.947385	0.3
C1_05720W_B	0.0405813	0.867619	0.5
C1_05730W_A	0.0389435	NA	0.2
C1_05730W_B	-0.0651227	0.919594	-0.3
C1_05740C_A	0.0259995	0.993082	0.1
C1_05740C_B	0.10818	0.919789	0.3
C1_05750C_A	-0.122114	0.868967	-0.5
C1_05750C_B	-0.0628765	0.957388	-0.2
C1_05760C_A	0.116474	0.903037	0.4
C1_05760C_B	0.00637705	0.996522	0
C1_05770C_A	-0.148349	0.840424	-0.6
C1_05770C_B	-0.177014	0.752001	-0.7
C1_05780W_A	-0.0835733	0.928432	-0.3
C1_05780W_B	-0.0126565	0.994976	0
C1_05790W_A	0.027654	0.992137	0.1
C1_05790W_B	-0.0733422	0.946172	-0.3
C1_05800C_A	0.00531472	0.996522	0
C1_05800C_B	0.123394	0.892858	0.4
C1_05810W_A	0.0707055	0.953832	0.2
C1_05810W_B	0.158206	0.809422	0.6
C1_05820C_A	0.0644608	0.962581	0.2
C1_05820C_B	0.0443173	0.984656	0.1
C1_05830W_A	NA	NA	0
C1_05830W_B	-0.0437365	NA	-0.7
C1_05840W_A	0.0955836	0.93317	0.3
C1_05840W_B	0.109433	0.914739	0.4
C1_05850W_A	-0.134558	0.828805	-0.6
C1_05850W_B	0.0816449	0.928432	0.3
C1_05860W_A	0.153016	0.840854	0.6
C1_05860W_B	-0.0663085	0.95979	-0.2
C1_05870W_A	-0.0446388	0.983104	-0.1
C1_05870W_B	0.088175	0.941691	0.3
C1_05880W_A	0.0258526	0.993082	0.1
C1_05880W_B	-0.0855164	0.942614	-0.3
C1_05890W_A	0.00140901	NA	0
C1_05890W_B	0.0546457	NA	0.6
C1_05900W_A	0.0164695	0.994976	0
C1_05900W_B	0.00775216	0.99523	0
C1_05910W_A	-0.0727251	0.957388	-0.2
C1_05910W_B	-0.166313	0.822937	-0.6
C1_05920W_A	-0.0321324	NA	-0.3
C1_05920W_B	-0.0328937	NA	-0.3
C1_05930C_A	0.0139148	0.994976	0
C1_05930C_B	-0.251305	0.506976	-1.2
C1_05940W_A	-0.877467	1.05931e-15	-17.5
C1_05940W_B	-1.10057	2.01161e-24	-26.6
C1_05950C_A	0.0253396	0.993082	0.1
C1_05950C_B	-0.0300607	0.99113	-0.1
C1_05960W_A	-0.278978	0.275487	-1.7
C1_05960W_B	-0.289548	0.164681	-2
C1_05970W_A	0.0354551	NA	0.6
C1_05970W_B	NA	NA	0
C1_05980W_A	-0.122557	0.891823	-0.4
C1_05980W_B	0.0476239	0.982265	0.1
C1_05990C_A	-0.0792473	0.953832	-0.2
C1_05990C_B	-0.344882	0.255412	-1.7
C1_06000W_A	-0.0394906	0.953832	-0.2
C1_06000W_B	0.0157946	NA	0.2
C1_06010W_A	0.134186	0.809486	0.6
C1_06010W_B	0.128489	0.854614	0.5
C1_06020W_A	-0.115997	0.891184	-0.4
C1_06020W_B	0.0995257	0.926956	0.3
C1_06030C_A	-0.123007	0.88349	-0.4
C1_06030C_B	0.106458	0.885782	0.4
C1_06040W_A	0.0350863	0.990658	0.1
C1_06040W_B	0.24632	0.559292	1.1
C1_06050C_A	0.0569333	0.952092	0.2
C1_06050C_B	0.155268	0.646487	0.9
C1_06060C_A	0.0640055	0.946184	0.3
C1_06060C_B	-0.0462152	0.967658	-0.2
C1_06070W_A	-0.0834462	0.885782	-0.4
C1_06070W_B	-9.47813e-05	0.999997	0
C1_06080C_A	-0.11093	0.907475	-0.4
C1_06080C_B	-0.0450839	0.984291	-0.1
C1_06090C_A	-0.16239	0.785886	-0.7
C1_06090C_B	-0.180785	0.737257	-0.8
C1_06100C_A	0.00337113	0.994976	0
C1_06100C_B	-0.0177289	0.980497	-0.1
C1_06110C_A	0.333438	0.268533	1.7
C1_06110C_B	0.155649	0.836066	0.6
C1_06120C_A	-0.0435301	0.969194	-0.2
C1_06120C_B	-0.104645	0.825735	-0.6
C1_06130C_A	0.0852694	0.947217	0.3
C1_06130C_B	0.0527342	0.97547	0.2
C1_06140C_A	0.010597	NA	0.1
C1_06140C_B	-0.0349369	NA	-0.3
C1_06150W_A	NA	NA	0
C1_06150W_B	NA	NA	0
C1_06160W_A	NA	NA	0
C1_06160W_B	0.0307945	NA	0.5
C1_06180W_A	0.13231	0.753247	0.7
C1_06180W_B	0.218066	0.308561	1.6
C1_06190C_A	0.0749852	0.928432	0.3
C1_06190C_B	0.253976	0.243051	1.8
C1_06200W_A	0.216293	0.677214	0.9
C1_06200W_B	0.391659	0.127229	2.2
C1_06210W_A	0.163938	0.828805	0.6
C1_06210W_B	-0.0694175	0.95952	-0.2
C1_06220C_A	0.00938453	NA	0.1
C1_06220C_B	0.00805273	NA	0.1
C1_06230C_A	-0.10006	0.928432	-0.3
C1_06230C_B	-0.127708	0.889386	-0.4
C1_06250W_A	-0.0543983	0.973642	-0.2
C1_06250W_B	0.0353279	0.990541	0.1
C1_06260W_A	0.0114392	NA	0.2
C1_06260W_B	NA	NA	0
C1_06270W_A	-0.0242126	0.993082	-0.1
C1_06270W_B	0.0149905	0.994976	0
C1_06280C_A	-0.00065779	0.999541	0
C1_06280C_B	-0.0267612	NA	-0.2
C1_06290C_A	NA	NA	0
C1_06290C_B	NA	NA	0
C1_06300W_A	0.0478396	NA	0.4
C1_06300W_B	-0.00911375	NA	-0.1
C1_06310W_A	0.0120002	NA	0.1
C1_06310W_B	-0.0312971	NA	-0.3
C1_06320W_A	0.0161259	0.994976	0
C1_06320W_B	-0.334864	0.2585	-1.7
C1_06330W_A	NA	NA	0
C1_06330W_B	NA	NA	0
C1_06340W_A	-0.0772788	0.867619	-0.5
C1_06340W_B	-0.0744407	0.884156	-0.4
C1_06350W_A	-0.0712688	0.958277	-0.2
C1_06350W_B	-0.0184366	0.994976	0
C1_06360W_A	-0.0691354	0.958335	-0.2
C1_06360W_B	0.199013	0.710965	0.8
C1_06370C_A	0.0120959	NA	0.2
C1_06370C_B	NA	NA	0
C1_06380C_A	0.0746046	0.956042	0.2
C1_06380C_B	-0.0158183	0.994976	0
C1_06390W_A	0.0774957	0.952705	0.2
C1_06390W_B	-0.0507202	0.965896	-0.2
C1_06400C_A	0.0119707	0.994976	0
C1_06400C_B	-0.19427	0.670213	-0.9
C1_06410W_A	-0.0579399	0.963933	-0.2
C1_06410W_B	-0.0544986	0.963933	-0.2
C1_06420C_A	-0.108663	0.919983	-0.3
C1_06420C_B	0.202516	0.703101	0.8
C1_06430C_A	NA	NA	0
C1_06430C_B	0.0114392	NA	0.2
C1_06440C_A	-0.173131	0.781499	-0.7
C1_06440C_B	-0.0152913	0.994976	0
C1_06450C_A	0.108856	0.244547	1.8
C1_06450C_B	0.137292	0.0403376	2.9
C1_06460C_A	0.0605718	0.689358	0.9
C1_06460C_B	0.0722349	0.647944	0.9
C1_06470W_A	0.108595	0.401368	1.4
C1_06470W_B	0.0888666	0.608169	1
C1_06480C_A	0.0560896	0.953832	0.2
C1_06480C_B	0.242577	0.314994	1.6
C1_06490C_A	-0.000460927	NA	0
C1_06490C_B	-0.0399805	NA	-0.6
C1_06500W_A	0.345259	0.230173	1.8
C1_06500W_B	0.132657	0.869388	0.5
C1_06510C_A	0.0256725	0.992137	0.1
C1_06510C_B	-0.00859691	0.994976	0
C1_06520C_A	0.105402	0.923142	0.3
C1_06520C_B	-0.0662178	0.961765	-0.2
C1_06530C_A	0.0149798	0.994713	0
C1_06530C_B	-0.123498	0.833669	-0.6
C1_06540C_A	0.318757	0.263656	1.7
C1_06540C_B	0.163569	0.798428	0.7
C1_06550W_A	-0.161071	0.533918	-1.1
C1_06550W_B	-0.205958	0.218111	-1.8
C1_06560W_A	-0.0153954	0.994976	0
C1_06560W_B	0.0256659	0.993082	0.1
C1_06570W_A	-0.177985	0.771468	-0.7
C1_06570W_B	-0.102048	0.919594	-0.3
C1_06580W_A	0.0487788	0.879678	0.5
C1_06580W_B	0.0579112	0.781499	0.7
C1_06590C_A	0.0282964	0.986043	0.1
C1_06590C_B	0.0942284	0.882077	0.4
C1_06600W_A	0.0992005	0.763532	0.7
C1_06600W_B	0.0750028	0.844164	0.5
C1_06610C_A	-0.0334198	NA	-0.3
C1_06610C_B	-0.052186	NA	-0.5
C1_06620C_A	0.000644474	NA	0
C1_06620C_B	0.00825191	NA	0.1
C1_06630W_A	-0.0537397	0.963933	-0.2
C1_06630W_B	-0.0838844	0.941231	-0.3
C1_06640C_A	-0.0153764	0.994976	0
C1_06640C_B	-0.252001	0.43977	-1.3
C1_06650W_A	-0.0336933	0.990658	-0.1
C1_06650W_B	0.0847977	0.941003	0.3
C1_06660W_A	-0.00986216	0.994976	0
C1_06660W_B	-0.117558	0.885426	-0.4
C1_06670W_A	0.133846	0.867619	0.5
C1_06670W_B	-0.104993	0.919001	-0.3
C1_06680W_A	-0.06837	0.95979	-0.2
C1_06680W_B	3.04982e-05	0.999997	0
C1_06690W_A	-0.0490781	0.9814	-0.1
C1_06690W_B	-0.131553	0.884641	-0.4
C1_06700W_A	0.0694326	0.953832	0.2
C1_06700W_B	0.0697035	0.952092	0.2
C1_06710W_A	0.155905	0.83876	0.6
C1_06710W_B	0.054888	0.975032	0.2
C1_06720C_A	-0.231465	0.636306	-1
C1_06720C_B	0.0633926	0.963933	0.2
C1_06730W_A	0.021481	0.993082	0.1
C1_06730W_B	0.149394	0.809486	0.6
C1_06740C_A	0.117313	0.872067	0.5
C1_06740C_B	0.20107	0.612366	1
C1_06750W_A	0.0527739	0.970843	0.2
C1_06750W_B	0.0357611	0.990658	0.1
C1_06760C_A	-0.050332	0.963933	-0.2
C1_06760C_B	0.135041	0.80924	0.6
C1_06770W_A	-0.123795	0.861403	-0.5
C1_06770W_B	0.0975255	0.908392	0.4
C1_06780W_A	-0.229622	0.553202	-1.1
C1_06780W_B	-0.181014	0.719386	-0.8
C1_06790C_A	0.0370456	0.982513	0.1
C1_06790C_B	0.00120107	0.998727	0
C1_06800W_A	0.0965352	0.919983	0.3
C1_06800W_B	0.294843	0.305286	1.6
C1_06810W_A	-0.0534225	0.95979	-0.2
C1_06810W_B	-0.164599	0.716816	-0.8
C1_06820W_A	0.255855	0.23562	1.8
C1_06820W_B	0.0781403	0.924065	0.3
C1_06830W_A	-0.0189573	NA	-0.1
C1_06830W_B	0.0105045	NA	0.1
C1_06840C_A	-0.0407914	0.985845	-0.1
C1_06840C_B	0.0743038	0.956197	0.2
C1_06850W_A	-0.110887	0.891823	-0.4
C1_06850W_B	-0.290162	0.309521	-1.6
C1_06860W_A	-0.0591608	NA	-0.8
C1_06860W_B	-0.0509504	NA	-0.7
C1_06870C_A	0.0391791	0.985845	0.1
C1_06870C_B	0.0323217	0.992137	0.1
C1_06880C_A	-0.053416	0.93317	-0.3
C1_06880C_B	-0.0143907	0.993082	-0.1
C1_06890C_A	0.205272	0.000203678	5.6
C1_06890C_B	0.208179	0.000942468	4.8
C1_06900C_A	0.0441999	0.93317	0.3
C1_06900C_B	0.116948	0.617054	1
C1_06910C_A	-0.175982	0.711846	-0.8
C1_06910C_B	-0.0161587	0.994428	0
C1_06920C_A	-0.004424	0.997432	0
C1_06920C_B	0.0470963	0.982265	0.1
C1_06930W_A	-0.0438892	0.948789	-0.2
C1_06930W_B	-0.104649	0.745922	-0.8
C1_06940C_A	0.0254473	0.993082	0.1
C1_06940C_B	-0.0128955	0.994976	0
C1_06950C_A	-0.0171063	NA	-0.1
C1_06950C_B	0.0338453	0.956197	0.2
C1_06960W_A	0.0568082	0.891184	0.4
C1_06960W_B	0.0619017	0.890443	0.4
C1_06970C_A	-0.0335388	0.990821	-0.1
C1_06970C_B	0.029609	0.992762	0.1
C1_06980C_A	-0.0727388	0.950491	-0.2
C1_06980C_B	0.16208	0.794618	0.7
C1_06990C_A	-0.0179629	NA	-0.2
C1_06990C_B	-0.0200069	NA	-0.4
C1_07000W_A	-0.118902	0.882514	-0.4
C1_07000W_B	-0.0790306	0.941217	-0.3
C1_07010W_A	-0.0448693	0.984628	-0.1
C1_07010W_B	0.135079	0.880763	0.4
C1_07020C_A	-0.0236615	0.993082	-0.1
C1_07020C_B	-0.186577	0.703101	-0.8
C1_07030C_A	0.434217	0.0702462	2.5
C1_07030C_B	0.333321	0.279915	1.7
C1_07040C_A	NA	NA	0
C1_07040C_B	0.0114392	NA	0.2
C1_07050C_A	-0.0474138	0.982265	-0.1
C1_07050C_B	-0.230894	0.641957	-0.9
C1_07060C_A	-0.0774389	0.952092	-0.2
C1_07060C_B	0.0186024	0.994713	0
C1_07070C_A	-0.0191126	0.994713	0
C1_07070C_B	0.00943282	0.994976	0
C1_07080W_A	0.107476	0.811228	0.6
C1_07080W_B	0.0789912	0.914741	0.3
C1_07090C_A	0.023047	0.992762	0.1
C1_07090C_B	0.0746778	0.928432	0.3
C1_07100C_A	0.0240027	0.993082	0.1
C1_07100C_B	0.12284	0.881816	0.4
C1_07110W_A	-0.13072	0.829372	-0.6
C1_07110W_B	0.123676	0.850186	0.5
C1_07120W_A	-0.504759	3.34169e-12	-13.9
C1_07120W_B	-0.39713	4.50537e-07	-8.5
C1_07130C_A	0.0440243	0.982265	0.1
C1_07130C_B	-0.00688517	0.995485	0
C1_07140C_A	-0.135502	0.74018	-0.8
C1_07140C_B	-0.163769	0.584805	-1.1
C1_07150W_A	0.0697894	0.95846	0.2
C1_07150W_B	0.107459	0.921085	0.3
C1_07160C_A	-0.216161	0.585577	-1
C1_07160C_B	-0.497445	0.00975346	-3.6
C1_07170C_A	-0.103034	0.920545	-0.3
C1_07170C_B	-0.0366976	0.986443	-0.1
C1_07180W_A	-0.0644657	0.953832	-0.2
C1_07180W_B	-0.0741288	0.944343	-0.3
C1_07190W_A	0.00256476	0.997665	0
C1_07190W_B	0.101909	0.902369	0.4
C1_07200W_A	-0.0359462	0.97547	-0.1
C1_07200W_B	-0.0237863	0.990658	-0.1
C1_07210C_A	0.239904	0.521189	1.2
C1_07210C_B	-0.00125709	0.998974	0
C1_07220W_A	0.230756	0.496531	1.2
C1_07220W_B	0.196276	0.636306	1
C1_07230W_A	-0.154713	0.735454	-0.8
C1_07230W_B	0.10066	0.887661	0.4
C1_07240W_A	0.270462	0.404185	1.4
C1_07240W_B	0.236215	0.568526	1.1
C1_07250C_A	-0.00415488	0.997432	0
C1_07250C_B	-0.0862431	0.938035	-0.3
C1_07260C_A	-0.0326314	0.992137	-0.1
C1_07260C_B	-0.115194	0.907475	-0.4
C1_07270W_A	0.110745	0.889386	0.4
C1_07270W_B	0.105835	0.899191	0.4
C1_07280C_A	0.221311	0.65995	0.9
C1_07280C_B	0.196192	0.745922	0.8
C1_07290W_A	0.0330382	0.992137	0.1
C1_07290W_B	0.3317	0.2552	1.7
C1_07310C_A	0.047184	NA	0.5
C1_07310C_B	-0.0206668	NA	-0.2
C1_07320W_A	-0.0170064	NA	-0.1
C1_07320W_B	0.0356023	0.95624	0.2
C1_07330W_A	-0.0836227	0.885207	-0.4
C1_07330W_B	0.0128078	0.994976	0
C1_07340W_A	-0.00860033	0.994976	0
C1_07340W_B	-0.0302796	0.985845	-0.1
C1_07350C_A	0.0724985	0.95384	0.2
C1_07350C_B	0.0538138	0.97547	0.1
C1_07360W_A	-0.0606159	0.95384	-0.2
C1_07360W_B	-0.0982004	0.900251	-0.4
C1_07370C_A	-0.0900728	0.934035	-0.3
C1_07370C_B	-0.108094	0.892543	-0.4
C1_07380C_A	-0.0513113	0.97547	-0.1
C1_07380C_B	-0.159052	0.803343	-0.6
C1_07390W_A	-0.00835448	0.994976	0
C1_07390W_B	-0.10881	0.885207	-0.4
C1_07400C_A	0.0782941	0.952705	0.2
C1_07400C_B	0.0906743	0.93681	0.3
C1_07410C_A	0.0542273	0.947385	0.3
C1_07410C_B	-0.0258115	0.982265	-0.1
C1_07420C_A	-0.220309	0.665684	-0.9
C1_07420C_B	0.0136266	0.994976	0
C1_07430W_A	-0.666541	1.86455e-06	-7.8
C1_07430W_B	-0.782989	1.56735e-07	-9
C1_07440W_A	-0.12096	0.876942	-0.5
C1_07440W_B	-0.0882566	0.929705	-0.3
C1_07450W_A	0.00115639	0.998692	0
C1_07450W_B	0.00622377	0.994976	0
C1_07460C_A	0.180542	0.780523	0.7
C1_07460C_B	-0.0113325	0.994976	0
C1_07470C_A	0.127501	0.889795	0.4
C1_07470C_B	0.0697385	0.958866	0.2
C1_07480C_A	0.0448781	NA	0.3
C1_07480C_B	-0.0324496	NA	-0.2
C1_07490C_A	-0.0362538	0.986043	-0.1
C1_07490C_B	0.0164627	0.994976	0
C1_07500C_A	0.17839	0.407677	1.4
C1_07500C_B	0.0641001	0.924107	0.3
C1_07510W_A	0.063804	0.959386	0.2
C1_07510W_B	-0.0989501	0.908258	-0.4
C1_07520C_A	-0.0182873	0.994976	0
C1_07520C_B	-0.0235616	0.993082	-0.1
C1_07530W_A	0.10504	0.761017	0.7
C1_07530W_B	0.196061	0.585577	1.1
C1_07540C_A	-0.157246	0.793936	-0.7
C1_07540C_B	-0.106659	0.9058	-0.4
C1_07550W_A	-0.0359035	0.986916	-0.1
C1_07550W_B	-0.058516	0.966347	-0.2
C1_07560W_A	-0.124906	0.885207	-0.4
C1_07560W_B	0.011545	0.994976	0
C1_07570C_A	-0.112203	0.912139	-0.4
C1_07570C_B	0.0891365	0.943591	0.3
C1_07580C_A	0.0792254	NA	1
C1_07580C_B	0.0163173	NA	0.1
C1_07590C_A	0.121674	0.899191	0.4
C1_07590C_B	-0.383132	0.143404	-2.1
C1_07600W_A	-0.0582177	0.947217	-0.3
C1_07600W_B	-0.119616	0.787395	-0.7
C1_07610C_A	-0.0649915	0.943591	-0.3
C1_07610C_B	-0.0759458	0.914739	-0.3
C1_07620C_A	-0.101498	0.746264	-0.7
C1_07620C_B	0.0673866	0.881816	0.4
C1_07630W_A	0.118169	0.847031	0.5
C1_07630W_B	0.0716	0.941563	0.3
C1_07640C_A	-0.0303812	0.961765	-0.2
C1_07640C_B	0.0364551	0.95384	0.2
C1_07650W_A	-0.0798591	0.865683	-0.5
C1_07650W_B	0.120558	0.828272	0.6
C1_07660W_A	0.052618	0.93681	0.3
C1_07660W_B	0.144255	0.729689	0.8
C1_07670W_A	-0.0119396	NA	-0.2
C1_07670W_B	0.00877757	NA	0.1
C1_07680W_A	-0.0834966	0.948298	-0.2
C1_07680W_B	-0.198909	0.733398	-0.8
C1_07690C_A	-0.0531437	0.972121	-0.2
C1_07690C_B	0.0444365	0.982265	0.1
C1_07700C_A	-0.1617	0.637552	-0.9
C1_07700C_B	-0.0542956	0.950226	-0.2
C1_07710C_A	-0.428083	1.50531e-05	-6.8
C1_07710C_B	-0.461938	3.13285e-05	-6.5
C1_07770W_A	-0.161856	0.831551	-0.6
C1_07770W_B	0.0500752	0.980497	0.1
C1_07780W_A	0.0740716	0.952705	0.2
C1_07780W_B	-0.00801336	0.994976	0
C1_07790C_A	-0.178614	0.771468	-0.7
C1_07790C_B	0.10413	0.900794	0.4
C1_07800W_A	0.131412	0.883578	0.4
C1_07800W_B	0.185866	0.773689	0.7
C1_07810C_A	-0.0900263	0.94297	-0.3
C1_07810C_B	0.10432	0.924107	0.3
C1_07820W_A	-0.08509	0.947385	-0.3
C1_07820W_B	0.0935292	0.939087	0.3
C1_07830C_A	0.00495935	0.996522	0
C1_07830C_B	0.0668237	0.957388	0.2
C1_07840W_A	-0.0581602	0.963048	-0.2
C1_07840W_B	-0.146943	0.805744	-0.6
C1_07850C_A	-0.0277349	0.992762	-0.1
C1_07850C_B	-0.139915	0.867619	-0.5
C1_07860W_A	-0.0318588	0.985939	-0.1
C1_07860W_B	-0.0714571	0.95384	-0.2
C1_07870C_A	-0.0778321	0.882514	-0.4
C1_07870C_B	-0.0871221	0.848279	-0.5
C1_07880C_A	-0.0559467	0.95979	-0.2
C1_07880C_B	-0.0240679	0.993082	-0.1
C1_07890C_A	-0.467382	6.0751e-06	-7.2
C1_07890C_B	-0.510999	1.1516e-07	-9.1
C1_07900W_A	-0.707268	1.13536e-07	-9.1
C1_07900W_B	-0.838375	2.12664e-10	-12
C1_07910C_A	0.072731	0.934035	0.3
C1_07910C_B	-0.0197304	0.993082	-0.1
C1_07920W_A	-0.00293591	0.997432	0
C1_07920W_B	0.00286335	0.997432	0
C1_07930C_A	-0.0588891	0.969194	-0.2
C1_07930C_B	0.103198	0.92151	0.3
C1_07940W_A	0.0258444	NA	0.2
C1_07940W_B	0.0103603	NA	0.1
C1_07950C_A	0.0151899	0.994976	0
C1_07950C_B	0.192868	0.700792	0.8
C1_07960W_A	0.0735979	0.954201	0.2
C1_07960W_B	0.176494	0.793936	0.7
C1_07970C_A	0.00866337	0.994976	0
C1_07970C_B	-0.0432949	0.984291	-0.1
C1_07980C_A	-0.128465	0.612712	-1
C1_07980C_B	0.0225518	NA	0.1
C1_07990C_A	0.362283	0.183361	2
C1_07990C_B	0.145575	0.81952	0.6
C1_08000W_A	-0.0824638	0.951997	-0.2
C1_08000W_B	-0.0470286	0.982265	-0.1
C1_08010W_A	0.0270854	0.985845	0.1
C1_08010W_B	0.1482	0.655005	0.9
C1_08020W_A	-0.125861	0.843259	-0.5
C1_08020W_B	-0.0585542	0.95813	-0.2
C1_08030W_A	0.10544	0.747998	0.7
C1_08030W_B	0.243639	0.0442194	2.8
C1_08040W_A	0.106018	0.900083	0.4
C1_08040W_B	0.180704	0.76383	0.7
C1_08050W_A	-0.0186954	0.992137	-0.1
C1_08050W_B	-0.0177596	0.992762	-0.1
C1_08060W_A	-0.049816	0.959386	-0.2
C1_08060W_B	-0.0291235	0.985845	-0.1
C1_08070W_A	-0.316812	0.145516	-2.1
C1_08070W_B	-0.28408	0.279052	-1.7
C1_08080C_A	-0.0121249	0.994713	0
C1_08080C_B	-0.15948	0.580112	-1.1
C1_08090C_A	-0.152194	0.126046	-2.2
C1_08090C_B	-0.165684	0.101531	-2.3
C1_08100W_A	0.000477982	0.999768	0
C1_08100W_B	-0.0342372	0.969158	-0.2
C1_08110W_A	-0.0808891	0.875126	-0.5
C1_08110W_B	-0.0634587	0.900203	-0.4
C1_08120W_A	-0.146857	0.834927	-0.6
C1_08120W_B	-0.16626	0.789996	-0.7
C1_08130C_A	-0.0313374	0.992137	-0.1
C1_08130C_B	-0.131971	0.876087	-0.5
C1_08140W_A	-0.0829693	0.949768	-0.2
C1_08140W_B	0.206264	0.70212	0.8
C1_08150C_A	0.0254211	0.992137	0.1
C1_08150C_B	0.0438772	0.973536	0.2
C1_08160W_A	0.00500281	0.996522	0
C1_08160W_B	-0.0292177	0.990658	-0.1
C1_08170C_A	-0.129126	0.884564	-0.4
C1_08170C_B	-0.456025	0.0468578	-2.8
C1_08180C_A	-0.0349636	0.980916	-0.1
C1_08180C_B	0.0113256	0.994976	0
C1_08190C_A	-0.273743	0.438196	-1.3
C1_08190C_B	-0.45575	0.0241369	-3.1
C1_08200W_A	0.247946	0.588536	1
C1_08200W_B	0.0545303	0.97547	0.1
C1_08210C_A	-0.205953	0.214586	-1.9
C1_08210C_B	-0.136314	0.646347	-0.9
C1_08220W_A	-0.268663	0.231461	-1.8
C1_08220W_B	-0.0873801	0.922068	-0.3
C1_08230C_A	0.399089	0.120121	2.2
C1_08230C_B	0.263538	0.533894	1.1
C1_08240C_A	0.00483786	0.996725	0
C1_08240C_B	0.0978251	0.930916	0.3
C1_08260C_A	0.0547171	0.961765	0.2
C1_08260C_B	0.0804061	0.928432	0.3
C1_08270C_A	-0.230872	0.517419	-1.2
C1_08270C_B	-0.13592	0.819798	-0.6
C1_08290C_A	-0.152829	0.646347	-0.9
C1_08290C_B	-0.113062	0.819647	-0.6
C1_08300W_A	-0.0633446	0.956042	-0.2
C1_08300W_B	-0.0394948	0.981829	-0.1
C1_08310W_A	-0.0562514	0.97362	-0.2
C1_08310W_B	-0.216712	0.683293	-0.9
C1_08320W_A	-0.0321059	0.95315	-0.2
C1_08320W_B	0.0671428	0.758277	0.7
C1_08330C_A	-0.143759	0.451008	-1.3
C1_08330C_B	-0.541375	0.00061273	-5
C1_08340C_A	-0.0668143	0.957642	-0.2
C1_08340C_B	-0.103696	0.924065	-0.3
C1_08350C_A	-0.173682	0.458554	-1.3
C1_08350C_B	-0.0879153	0.877422	-0.5
C1_08360C_A	-0.0322884	0.926956	-0.3
C1_08360C_B	-0.0767423	0.646347	-0.9
C1_08370W_A	0.164984	0.694961	0.8
C1_08370W_B	0.141481	0.797476	0.7
C1_08380W_A	0.0536637	0.670213	0.9
C1_08380W_B	0.0317396	0.883578	0.4
C1_08390C_A	-0.0193616	0.993611	-0.1
C1_08390C_B	0.051551	0.973642	0.2
C1_08400C_A	-0.446162	1.29493e-08	-10.1
C1_08400C_B	-0.561777	8.69386e-15	-16.6
C1_08410C_A	-0.230077	0.0104383	-3.6
C1_08410C_B	-0.24058	0.0135918	-3.5
C1_08420W_A	0.00776942	0.994976	0
C1_08420W_B	-0.120474	0.780505	-0.7
C1_08430W_A	0.0732376	0.941217	0.3
C1_08430W_B	0.107187	0.900759	0.4
C1_08440C_A	0.178624	0.798916	0.7
C1_08440C_B	0.128954	0.887711	0.4
C1_08450C_A	0.0995654	0.823063	0.6
C1_08450C_B	0.205326	0.256119	1.7
C1_08460C_A	-0.233809	0.256011	-1.7
C1_08460C_B	-0.21999	0.403255	-1.4
C1_08470W_A	-0.0149758	0.994976	0
C1_08470W_B	-0.0477968	0.975679	-0.1
C1_08480C_A	0.0352547	0.991385	0.1
C1_08480C_B	-0.0402636	0.985939	-0.1
C1_08490W_A	-0.222764	0.472061	-1.2
C1_08490W_B	-0.182307	0.695535	-0.8
C1_08500C_A	0.172489	0.0349875	2.9
C1_08500C_B	0.138912	0.133534	2.1
C1_08510W_A	0.128134	0.883578	0.4
C1_08510W_B	0.0285376	0.993082	0.1
C1_08520C_A	-0.0845257	0.924435	-0.3
C1_08520C_B	0.0756964	0.941217	0.3
C1_08530W_A	0.0960451	0.793168	0.7
C1_08530W_B	-0.0705463	0.897117	-0.4
C1_08540C_A	0.00929652	0.994976	0
C1_08540C_B	0.0881847	0.900844	0.4
C1_08550C_A	0.121655	0.739628	0.8
C1_08550C_B	0.148518	0.589617	1
C1_08560W_A	-0.198586	0.173974	-2
C1_08560W_B	-0.0931909	0.802255	-0.6
C1_08570C_A	-0.0447422	0.98442	-0.1
C1_08570C_B	0.0318771	0.992137	0.1
C1_08580C_A	0.110547	0.846578	0.5
C1_08580C_B	0.158052	0.701626	0.8
C1_08590C_A	0.0180279	0.994428	0.1
C1_08590C_B	0.0444356	0.950491	0.2
C1_08600C_A	-0.175378	0.39332	-1.4
C1_08600C_B	-0.0950232	0.844164	-0.5
C1_08610C_A	-0.0661197	0.932093	-0.3
C1_08610C_B	-0.075895	0.921085	-0.3
C1_08620W_A	-0.0672747	0.95979	-0.2
C1_08620W_B	0.0853398	0.947385	0.3
C1_08630W_A	0.136453	0.865138	0.5
C1_08630W_B	-0.0913205	0.928432	-0.3
C1_08640W_A	0.0466424	0.981847	0.1
C1_08640W_B	0.0973943	0.927194	0.3
C1_08650C_A	-0.10214	0.924107	-0.3
C1_08650C_B	-0.11716	0.900794	-0.4
C1_08660C_A	-0.202556	0.733858	-0.8
C1_08660C_B	0.0812246	0.952092	0.2
C1_08670W_A	-0.154345	0.789732	-0.7
C1_08670W_B	0.305683	0.203309	1.9
C1_08680C_A	0.0813632	0.947385	0.3
C1_08680C_B	0.00158719	0.998696	0
C1_08690W_A	-0.0144689	0.994976	0
C1_08690W_B	0.222658	0.623879	1
C1_08700W_A	0.119733	0.826585	0.6
C1_08700W_B	-0.177097	0.63565	-1
C1_08710W_A	0.0307538	0.99247	0.1
C1_08710W_B	-0.109402	0.919167	-0.3
C1_08730W_A	0.163773	0.825735	0.6
C1_08730W_B	0.016494	0.994976	0
C1_08740C_A	-0.0569816	0.910158	-0.4
C1_08740C_B	-0.154425	0.330129	-1.5
C1_08750W_A	0.0348771	0.989883	0.1
C1_08750W_B	0.053478	0.973642	0.2
C1_08760W_A	-0.105724	0.92151	-0.3
C1_08760W_B	0.067417	0.95979	0.2
C1_08770W_A	0.016047	0.994976	0
C1_08770W_B	0.0206452	0.993289	0.1
C1_08780W_A	0.0453403	0.972163	0.2
C1_08780W_B	-0.0155602	0.994976	0
C1_08790W_A	-0.109588	0.875173	-0.5
C1_08790W_B	-0.131629	0.852961	-0.5
C1_08800W_A	0.232305	0.564087	1.1
C1_08800W_B	-0.0591214	0.963911	-0.2
C1_08810C_A	0.0131839	0.994428	0.1
C1_08810C_B	-0.0954628	0.831551	-0.6
C1_08820C_A	0.031176	0.992137	0.1
C1_08820C_B	0.203249	0.700792	0.8
C1_08830C_A	0.0401515	0.967658	0.2
C1_08830C_B	0.101727	0.879562	0.5
C1_08840W_A	0.0988838	0.900844	0.4
C1_08840W_B	-0.0223339	0.993082	-0.1
C1_08850C_A	-0.050582	0.967658	-0.2
C1_08850C_B	0.264332	0.443988	1.3
C1_08860C_A	-0.0638452	0.96326	-0.2
C1_08860C_B	-0.0438606	0.984291	-0.1
C1_08870C_A	-0.146766	0.752001	-0.7
C1_08870C_B	0.213796	0.449673	1.3
C1_08880W_A	0.0725144	0.953832	0.2
C1_08880W_B	0.0438241	0.982513	0.1
C1_08890C_A	0.0301306	0.987843	0.1
C1_08890C_B	0.0327854	0.98559	0.1
C1_08900W_A	-0.122305	0.890129	-0.4
C1_08900W_B	0.0180059	0.994976	0
C1_08910C_A	0.0795759	0.953706	0.2
C1_08910C_B	-0.120558	0.891527	-0.4
C1_08920W_A	-0.0949073	0.897048	-0.4
C1_08920W_B	-0.0627323	0.952629	-0.2
C1_08930C_A	0.00855225	0.994976	0
C1_08930C_B	-0.00794731	0.994976	0
C1_08940C_A	0.0956134	0.934035	0.3
C1_08940C_B	-0.00741526	0.995986	0
C1_08950W_A	-0.104453	0.904278	-0.4
C1_08950W_B	-0.0974264	0.910356	-0.4
C1_08960W_A	0.0359424	0.985939	0.1
C1_08960W_B	-0.0732379	0.954981	-0.2
C1_08970W_A	0.156493	0.791321	0.7
C1_08970W_B	0.100906	0.924065	0.3
C1_08980C_A	-0.0763504	0.902982	-0.4
C1_08980C_B	-0.0110618	0.994976	0
C1_08990C_A	-0.0217851	0.993082	-0.1
C1_08990C_B	-0.033194	0.985845	-0.1
C1_09000W_A	-0.00819189	0.994976	0
C1_09000W_B	-0.041187	0.984628	-0.1
C1_09010W_A	0.0656361	0.95979	0.2
C1_09010W_B	-0.264779	0.519195	-1.2
C1_09020W_A	0.0276436	0.987843	0.1
C1_09020W_B	0.0439295	0.967658	0.2
C1_09030C_A	-0.00613372	0.994976	0
C1_09030C_B	-0.0467667	0.934906	-0.3
C1_09040C_A	-0.0563993	0.967658	-0.2
C1_09040C_B	0.0577071	0.965032	0.2
C1_09050W_A	-0.172751	0.805256	-0.6
C1_09050W_B	-0.0111783	0.994976	0
C1_09060C_A	-0.0974483	0.900083	-0.4
C1_09060C_B	0.0859775	0.92151	0.3
C1_09070W_A	-0.0543437	0.97547	-0.1
C1_09070W_B	-0.00294789	0.997665	0
C1_09080C_A	-0.132074	0.750746	-0.7
C1_09080C_B	-0.010478	0.994976	0
C1_09090C_A	-0.194294	0.745922	-0.8
C1_09090C_B	0.0201352	0.994428	0.1
C1_09100W_A	0.00195444	0.997432	0
C1_09100W_B	0.101406	0.909556	0.4
C1_09110W_A	0.102367	0.811228	0.6
C1_09110W_B	0.0244593	0.992137	0.1
C1_09120W_A	-0.164636	0.820346	-0.6
C1_09120W_B	0.0496757	0.980497	0.1
C1_09130W_A	0.256908	0.545124	1.1
C1_09130W_B	0.093665	0.936568	0.3
C1_09140C_A	0.0282304	0.992764	0.1
C1_09140C_B	0.0404866	0.985845	0.1
C1_09150W_A	-0.011669	NA	-0.2
C1_09150W_B	-0.0180043	NA	-0.2
C1_09160W_A	0.354883	0.0966656	2.4
C1_09160W_B	0.046284	0.979975	0.1
C1_09170W_A	-0.221649	0.505054	-1.2
C1_09170W_B	0.092806	0.908722	0.4
C1_09180W_A	-0.0676524	0.947385	-0.3
C1_09180W_B	-0.0710215	0.947385	-0.3
C1_09190C_A	0.0522507	0.963933	0.2
C1_09190C_B	0.038213	0.984656	0.1
C1_09200W_A	0.132946	0.88349	0.4
C1_09200W_B	-0.0647822	0.961765	-0.2
C1_09210C_A	-0.287384	0.421409	-1.4
C1_09210C_B	-0.123345	0.892858	-0.4
C1_09220W_A	-0.141294	0.867359	-0.5
C1_09220W_B	-0.293122	0.407677	-1.4
C1_09230C_A	-0.258322	0.53773	-1.1
C1_09230C_B	-0.0597199	0.965024	-0.2
C1_09240C_A	0.0447961	0.942614	0.3
C1_09240C_B	-0.0611289	0.92151	-0.3
C1_09250W_A	-0.0851834	0.942614	-0.3
C1_09250W_B	-0.0956458	0.932093	-0.3
C1_09260C_A	0.074371	0.95384	0.2
C1_09260C_B	0.113442	0.899281	0.4
C1_09270W_A	-0.0739048	0.953832	-0.2
C1_09270W_B	0.0663746	0.959386	0.2
C1_09280W_A	-0.191249	0.745922	-0.8
C1_09280W_B	0.0741038	0.953832	0.2
C1_09290C_A	-0.496203	0.0191435	-3.3
C1_09290C_B	-0.430687	0.0635353	-2.6
C1_09300C_A	-0.0464538	NA	-0.4
C1_09300C_B	-0.1468	0.572069	-1.1
C1_09310C_A	-0.0431638	0.962694	-0.2
C1_09310C_B	0.0208911	0.992137	0.1
C1_09320C_A	0.117992	0.902369	0.4
C1_09320C_B	-0.14025	0.862504	-0.5
C1_09330W_A	0.0638142	0.95979	0.2
C1_09330W_B	0.0846244	0.94018	0.3
C1_09340C_A	-0.246146	0.428373	-1.3
C1_09340C_B	-0.05111	0.953832	-0.2
C1_09350W_A	-0.00903046	0.994976	0
C1_09350W_B	0.0796712	0.892886	0.4
C1_09360C_A	-0.235386	0.379238	-1.4
C1_09360C_B	-0.247064	0.351801	-1.5
C1_09370W_A	-0.0838981	0.94297	-0.3
C1_09370W_B	0.190893	0.742171	0.8
C1_09380W_A	0.335974	0.240619	1.8
C1_09380W_B	-0.103099	0.92151	-0.3
C1_09390W_A	0.359951	0.213058	1.9
C1_09390W_B	0.00859336	0.994976	0
C1_09400C_A	-0.0193407	0.993651	-0.1
C1_09400C_B	-0.120329	0.867889	-0.5
C1_09410W_A	NA	NA	0
C1_09410W_B	NA	NA	0
C1_09420W_A	9.45099e-05	NA	0
C1_09420W_B	NA	NA	0
C1_09430W_A	-0.0220093	0.993082	-0.1
C1_09430W_B	0.0178165	0.993289	0.1
C1_09440W_A	-0.112668	0.906991	-0.4
C1_09440W_B	0.0639052	0.961432	0.2
C1_09450C_A	-0.0260539	0.989886	-0.1
C1_09450C_B	-0.00466113	0.996522	0
C1_09460W_A	0.0313871	0.970843	0.2
C1_09460W_B	0.112003	0.810413	0.6
C1_09470C_A	-0.171261	0.694961	-0.8
C1_09470C_B	-0.0841809	0.920501	-0.3
C1_09480W_A	-0.062569	0.965211	-0.2
C1_09480W_B	-0.105655	0.923142	-0.3
C1_09490C_A	-0.13356	0.230173	-1.8
C1_09490C_B	-0.109737	0.406829	-1.4
C1_09500W_A	-0.0199973	0.985845	-0.1
C1_09500W_B	0.0548714	0.928432	0.3
C1_09510W_A	-0.11235	0.819798	-0.6
C1_09510W_B	-0.106664	0.83827	-0.6
C1_09520C_A	-0.11022	0.903723	-0.4
C1_09520C_B	0.0268528	0.993082	0.1
C1_09530W_A	0.171652	0.810413	0.6
C1_09530W_B	0.110657	0.914741	0.3
C1_09540W_A	0.0171039	0.994976	0
C1_09540W_B	0.0205946	0.993651	0.1
C1_09550W_A	-0.0170794	NA	-0.2
C1_09550W_B	0.00317604	NA	0
C1_09560C_A	0.0104267	NA	0.1
C1_09560C_B	-0.060944	NA	-0.7
C1_09570W_A	0.163412	0.753247	0.7
C1_09570W_B	-0.293489	0.238543	-1.8
C1_09580C_A	-0.0309095	NA	-0.3
C1_09580C_B	-0.0526754	NA	-0.8
C1_09590C_A	-0.011669	NA	-0.2
C1_09590C_B	NA	NA	0
C1_09600C_A	0.0797781	0.953339	0.2
C1_09600C_B	0.195043	0.750046	0.7
C1_09610W_A	0.155115	0.796126	0.7
C1_09610W_B	0.121207	0.858594	0.5
C1_09620C_A	0.0155048	0.994976	0
C1_09620C_B	0.187287	0.752001	0.7
C1_09630W_A	-0.102181	0.444919	-1.3
C1_09630W_B	-0.0847016	0.617795	-1
C1_09640W_A	-0.17663	0.0771723	-2.5
C1_09640W_B	-0.157215	0.311809	-1.6
C1_09650W_A	0.0697139	0.958662	0.2
C1_09650W_B	-0.151216	0.852131	-0.5
C1_09660W_A	-0.146546	0.753247	-0.7
C1_09660W_B	-0.167015	0.738067	-0.8
C1_09670C_A	0.0578703	0.967658	0.2
C1_09670C_B	-0.221319	0.646327	-0.9
C1_09680W_A	-0.0537502	0.885207	-0.4
C1_09680W_B	-0.0651859	0.82047	-0.6
C1_09690W_A	-0.231973	0.592615	-1
C1_09690W_B	-0.336445	0.264864	-1.7
C1_09700W_A	0.00507447	NA	0.1
C1_09700W_B	0.00507447	NA	0.1
C1_09710C_A	-0.186486	0.496545	-1.2
C1_09710C_B	-0.0750125	0.921287	-0.3
C1_09720W_A	-0.0153636	0.993082	-0.1
C1_09720W_B	-0.0400456	0.957388	-0.2
C1_09730W_A	0.0243084	0.993082	0.1
C1_09730W_B	0.143973	0.865683	0.5
C1_09740C_A	-0.136292	0.824214	-0.6
C1_09740C_B	-0.0228846	0.992762	-0.1
C1_09750W_A	0.00248025	0.997665	0
C1_09750W_B	-0.0386766	0.984628	-0.1
C1_09760C_A	-0.144761	0.862504	-0.5
C1_09760C_B	-0.0168142	0.994976	0
C1_09770W_A	-0.0681335	0.926255	-0.3
C1_09770W_B	-0.159327	0.534205	-1.1
C1_09780C_A	0.0300142	0.992762	0.1
C1_09780C_B	0.0249972	0.993082	0.1
C1_09790C_A	0.119877	0.881816	0.4
C1_09790C_B	-0.039061	0.985845	-0.1
C1_09800C_A	-0.0231909	0.993082	-0.1
C1_09800C_B	-0.00887518	0.994976	0
C1_09810W_A	0.00920743	0.994976	0
C1_09810W_B	0.0806091	0.930684	0.3
C1_09820C_A	-0.0835768	0.948789	-0.2
C1_09820C_B	0.119684	0.900083	0.4
C1_09830W_A	-0.104039	0.885207	-0.4
C1_09830W_B	-0.140487	0.796126	-0.7
C1_09840C_A	0.24148	0.568869	1.1
C1_09840C_B	-0.113133	0.900083	-0.4
C1_09850C_A	0.0709123	0.953832	0.2
C1_09850C_B	-0.174181	0.671427	-0.9
C1_09860C_A	0.00297245	0.997432	0
C1_09860C_B	0.0627098	0.95384	0.2
C1_09870W_A	-0.0691349	0.95813	-0.2
C1_09870W_B	-0.0996145	0.924906	-0.3
C1_09880C_A	-0.125216	0.891527	-0.4
C1_09880C_B	0.17117	0.811228	0.6
C1_09890C_A	-0.00929524	NA	-0.1
C1_09890C_B	-0.00479658	NA	-0.1
C1_09900W_A	0.0591507	NA	0.8
C1_09900W_B	-0.0104887	NA	-0.1
C1_09910C_A	0.262791	0.533918	1.1
C1_09910C_B	0.0440149	0.984628	0.1
C1_09920W_A	0.282259	0.458554	1.3
C1_09920W_B	-0.180471	0.793936	-0.7
C1_09930W_A	-0.164511	0.691771	-0.9
C1_09930W_B	0.0341628	0.960931	0.2
C1_09940W_A	0.111651	0.900844	0.4
C1_09940W_B	-0.0459198	0.981141	-0.1
C1_09950C_A	0.0295409	0.992762	0.1
C1_09950C_B	0.0507545	0.979749	0.1
C1_09960W_A	0.0346745	0.990541	0.1
C1_09960W_B	0.0670503	0.959563	0.2
C1_09970C_A	-0.203711	0.696061	-0.8
C1_09970C_B	-0.336824	0.213759	-1.9
C1_09980C_A	0.13108	0.876087	0.5
C1_09980C_B	-0.151845	0.841892	-0.5
C1_09990W_A	0.116356	0.898607	0.4
C1_09990W_B	0.138223	0.831551	0.6
C1_10000C_A	-0.110776	0.909556	-0.4
C1_10000C_B	-0.144215	0.865138	-0.5
C1_10010C_A	-0.0896741	0.914739	-0.4
C1_10010C_B	-0.0538065	0.967072	-0.2
C1_10020W_A	-0.0240526	0.993082	-0.1
C1_10020W_B	0.0883341	0.941772	0.3
C1_10030W_A	0.006931	0.994976	0
C1_10030W_B	0.136568	0.69166	0.9
C1_10040W_A	0.0092771	0.994976	0
C1_10040W_B	-0.0451132	0.968802	-0.2
C1_10050W_A	NA	NA	0
C1_10050W_B	-0.011669	NA	-0.2
C1_10060C_A	-0.00821341	NA	-0.1
C1_10060C_B	-0.0840767	NA	-0.8
C1_10070C_A	0.115362	0.867619	0.5
C1_10070C_B	0.136549	0.832589	0.6
C1_10080W_A	0.0248835	0.993082	0.1
C1_10080W_B	0.0426973	0.985845	0.1
C1_10090C_A	0.00190358	0.998533	0
C1_10090C_B	0.0381175	0.984656	0.1
C1_10100C_A	0.145211	0.564163	1.1
C1_10100C_B	0.0367625	0.953706	0.2
C1_10110W_A	-0.11526	0.872067	-0.5
C1_10110W_B	-0.0987329	0.929705	-0.3
C1_10120C_A	-0.102538	0.890129	-0.4
C1_10120C_B	-0.0318322	0.986443	-0.1
C1_10130W_A	0.130596	0.74018	0.8
C1_10130W_B	0.0241881	0.985939	0.1
C1_10140C_A	-0.164959	0.819798	-0.6
C1_10140C_B	-0.0220561	0.993289	-0.1
C1_10150W_A	-0.0183551	NA	-0.1
C1_10150W_B	-0.0646258	0.891184	-0.4
C1_10160W_A	-0.118542	0.313364	-1.6
C1_10160W_B	-0.125911	0.233245	-1.8
C1_10170W_A	NA	NA	0
C1_10170W_B	NA	NA	0
C1_10180C_A	-0.0219812	0.993289	-0.1
C1_10180C_B	0.00490781	0.996725	0
C1_10190W_A	0.21515	0.563073	1.1
C1_10190W_B	0.14069	0.834927	0.6
C1_10200C_A	-0.124306	0.786694	-0.7
C1_10200C_B	0.0257542	0.989886	0.1
C1_10210C_A	-0.0275707	0.992137	-0.1
C1_10210C_B	-0.332661	0.139267	-2.1
C1_10220C_A	-0.119887	0.880999	-0.4
C1_10220C_B	-0.126371	0.867889	-0.5
C1_10230C_A	-0.0937317	0.934035	-0.3
C1_10230C_B	-0.00965137	0.994976	0
C1_10240C_A	0.0395827	NA	0.3
[truncated: 10,868 more rows]
