# Supplementary material
Source: publisher figshare collection journal article supplement (https://gsajournals.figshare.com/articles/dataset/_/14597676)

Figure S1

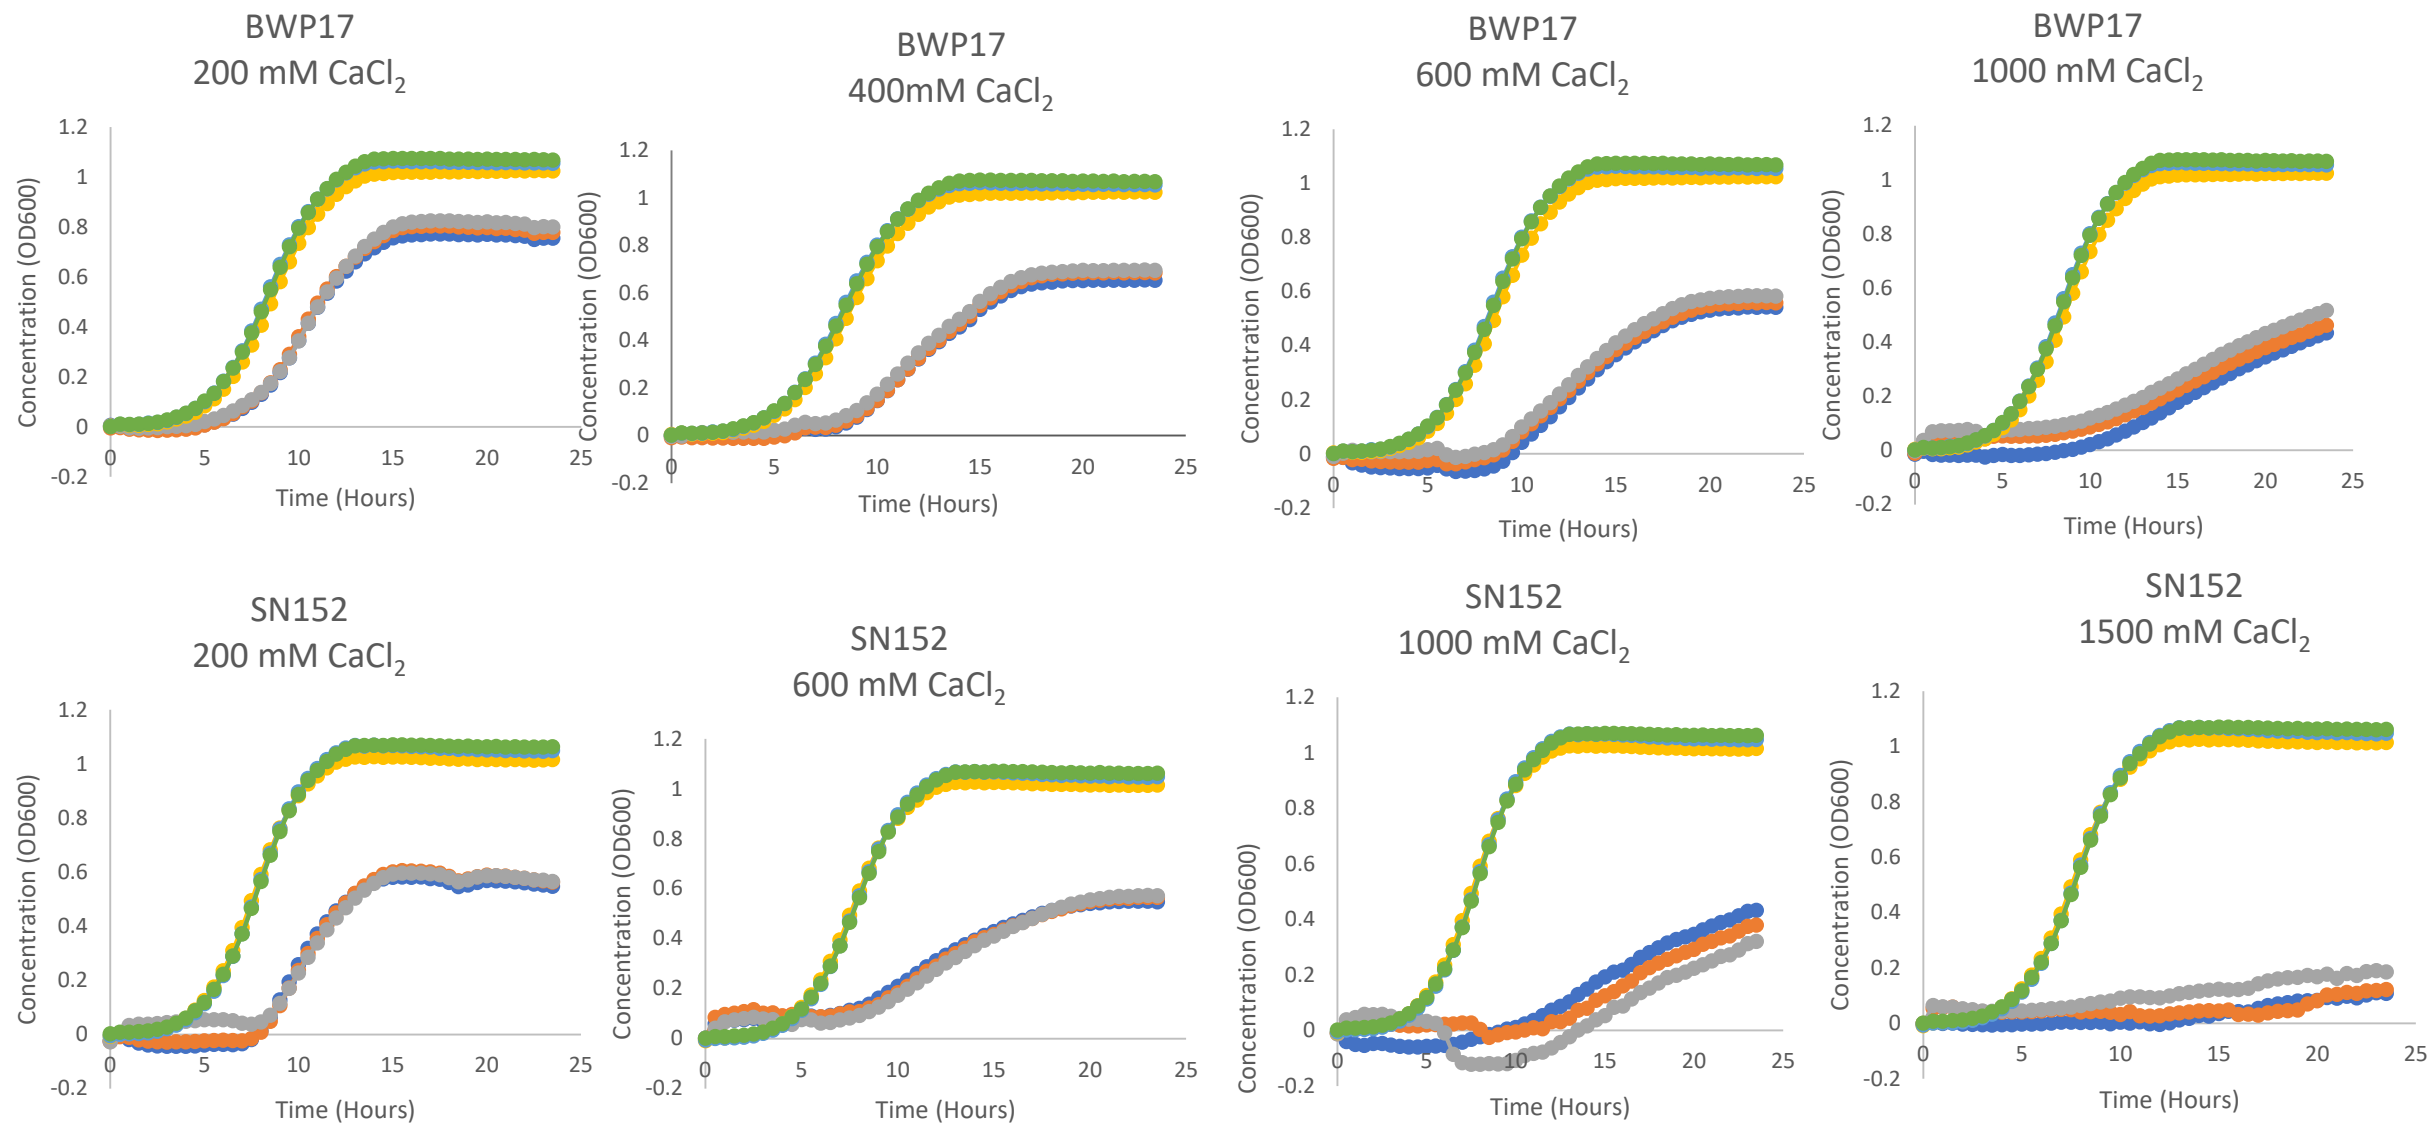

Figure S2

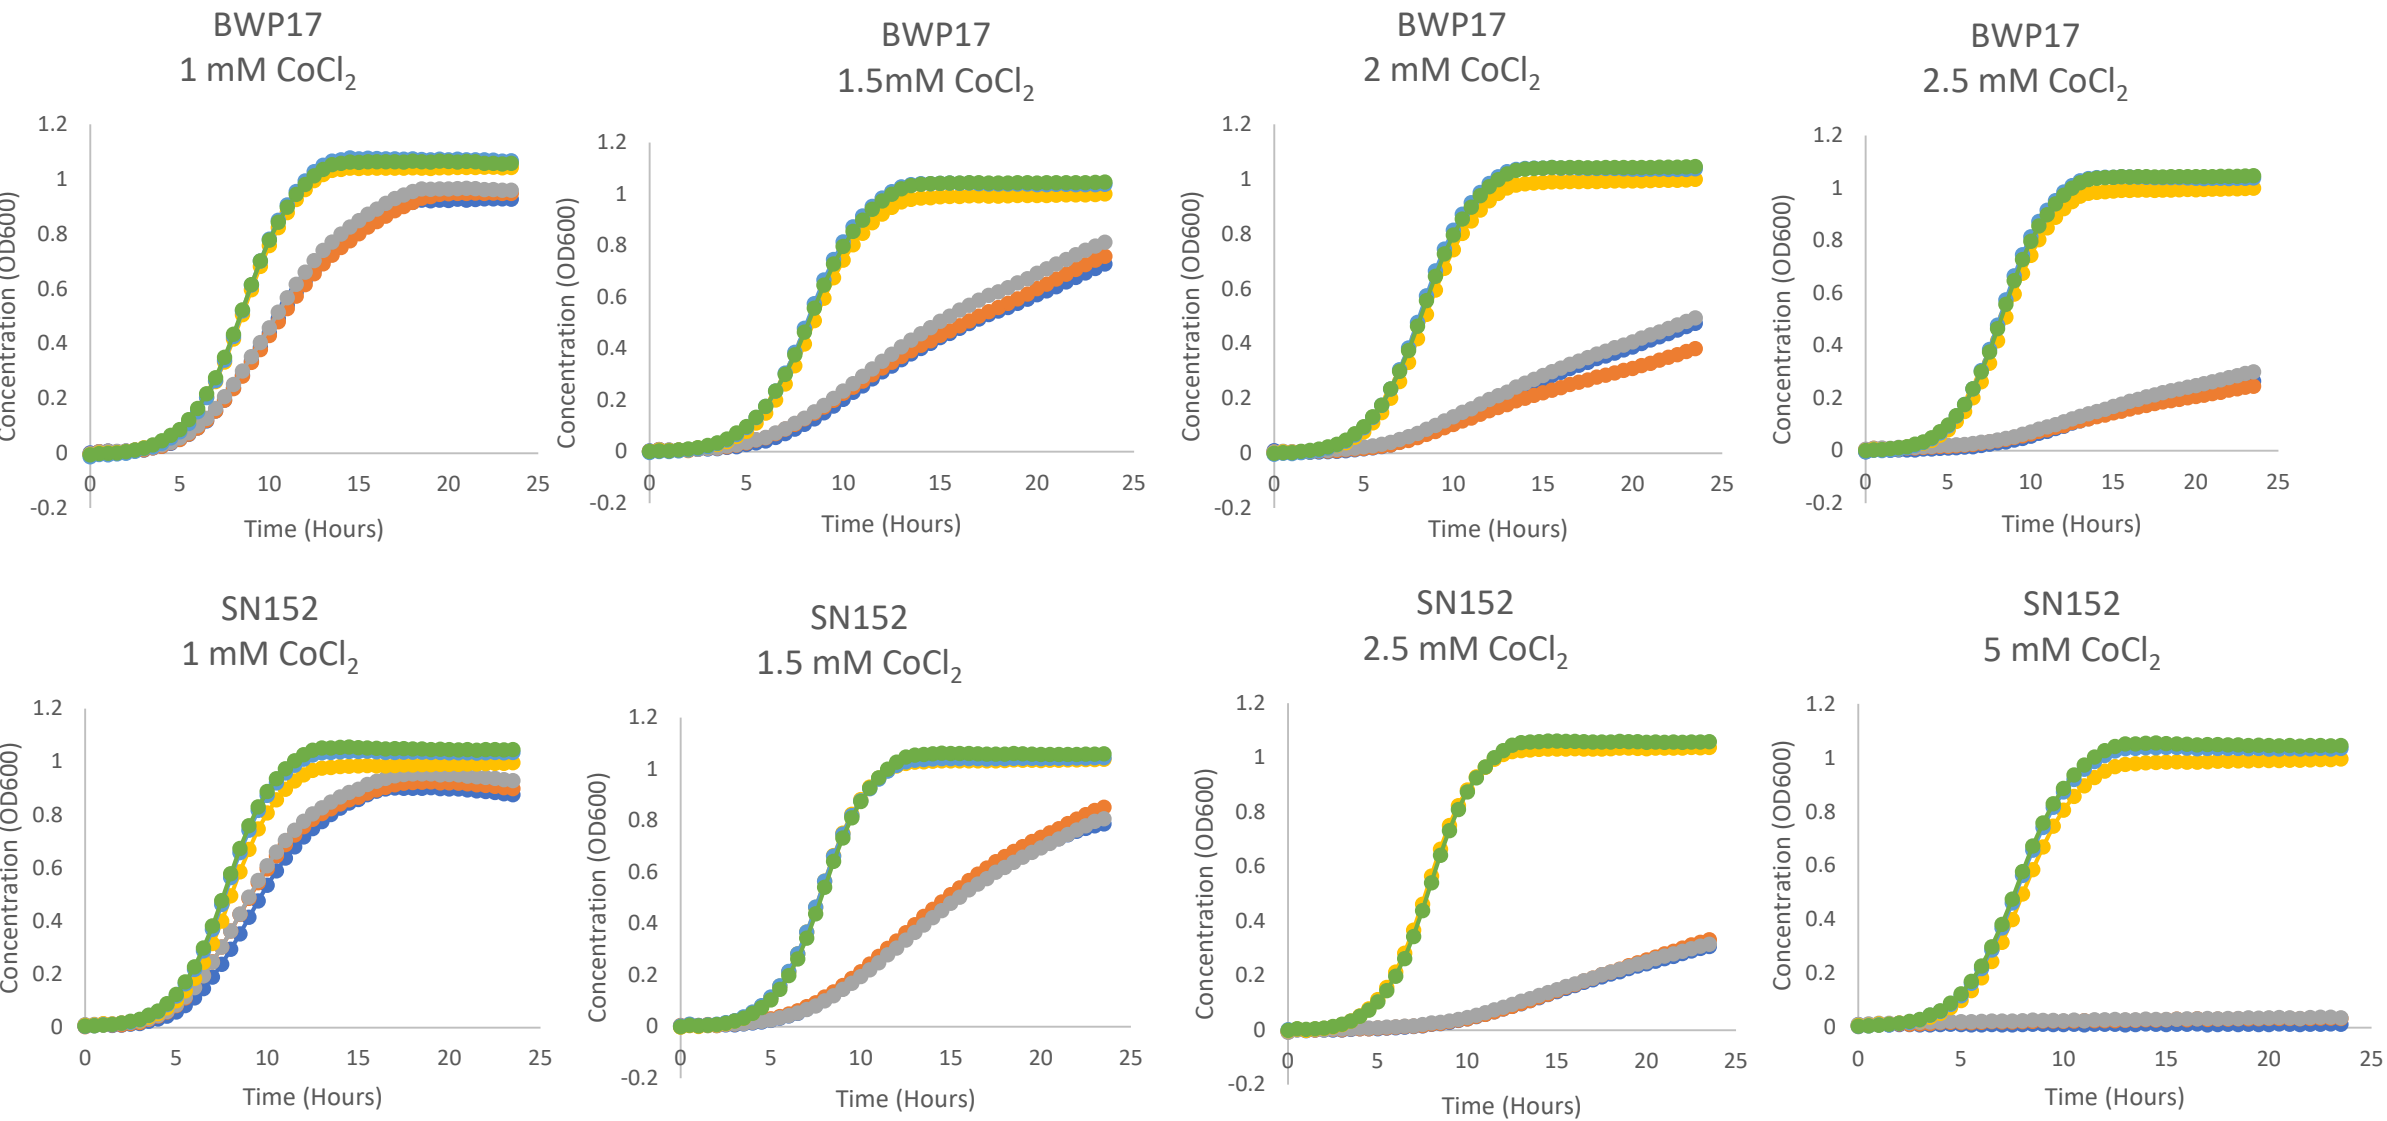

Figure S3

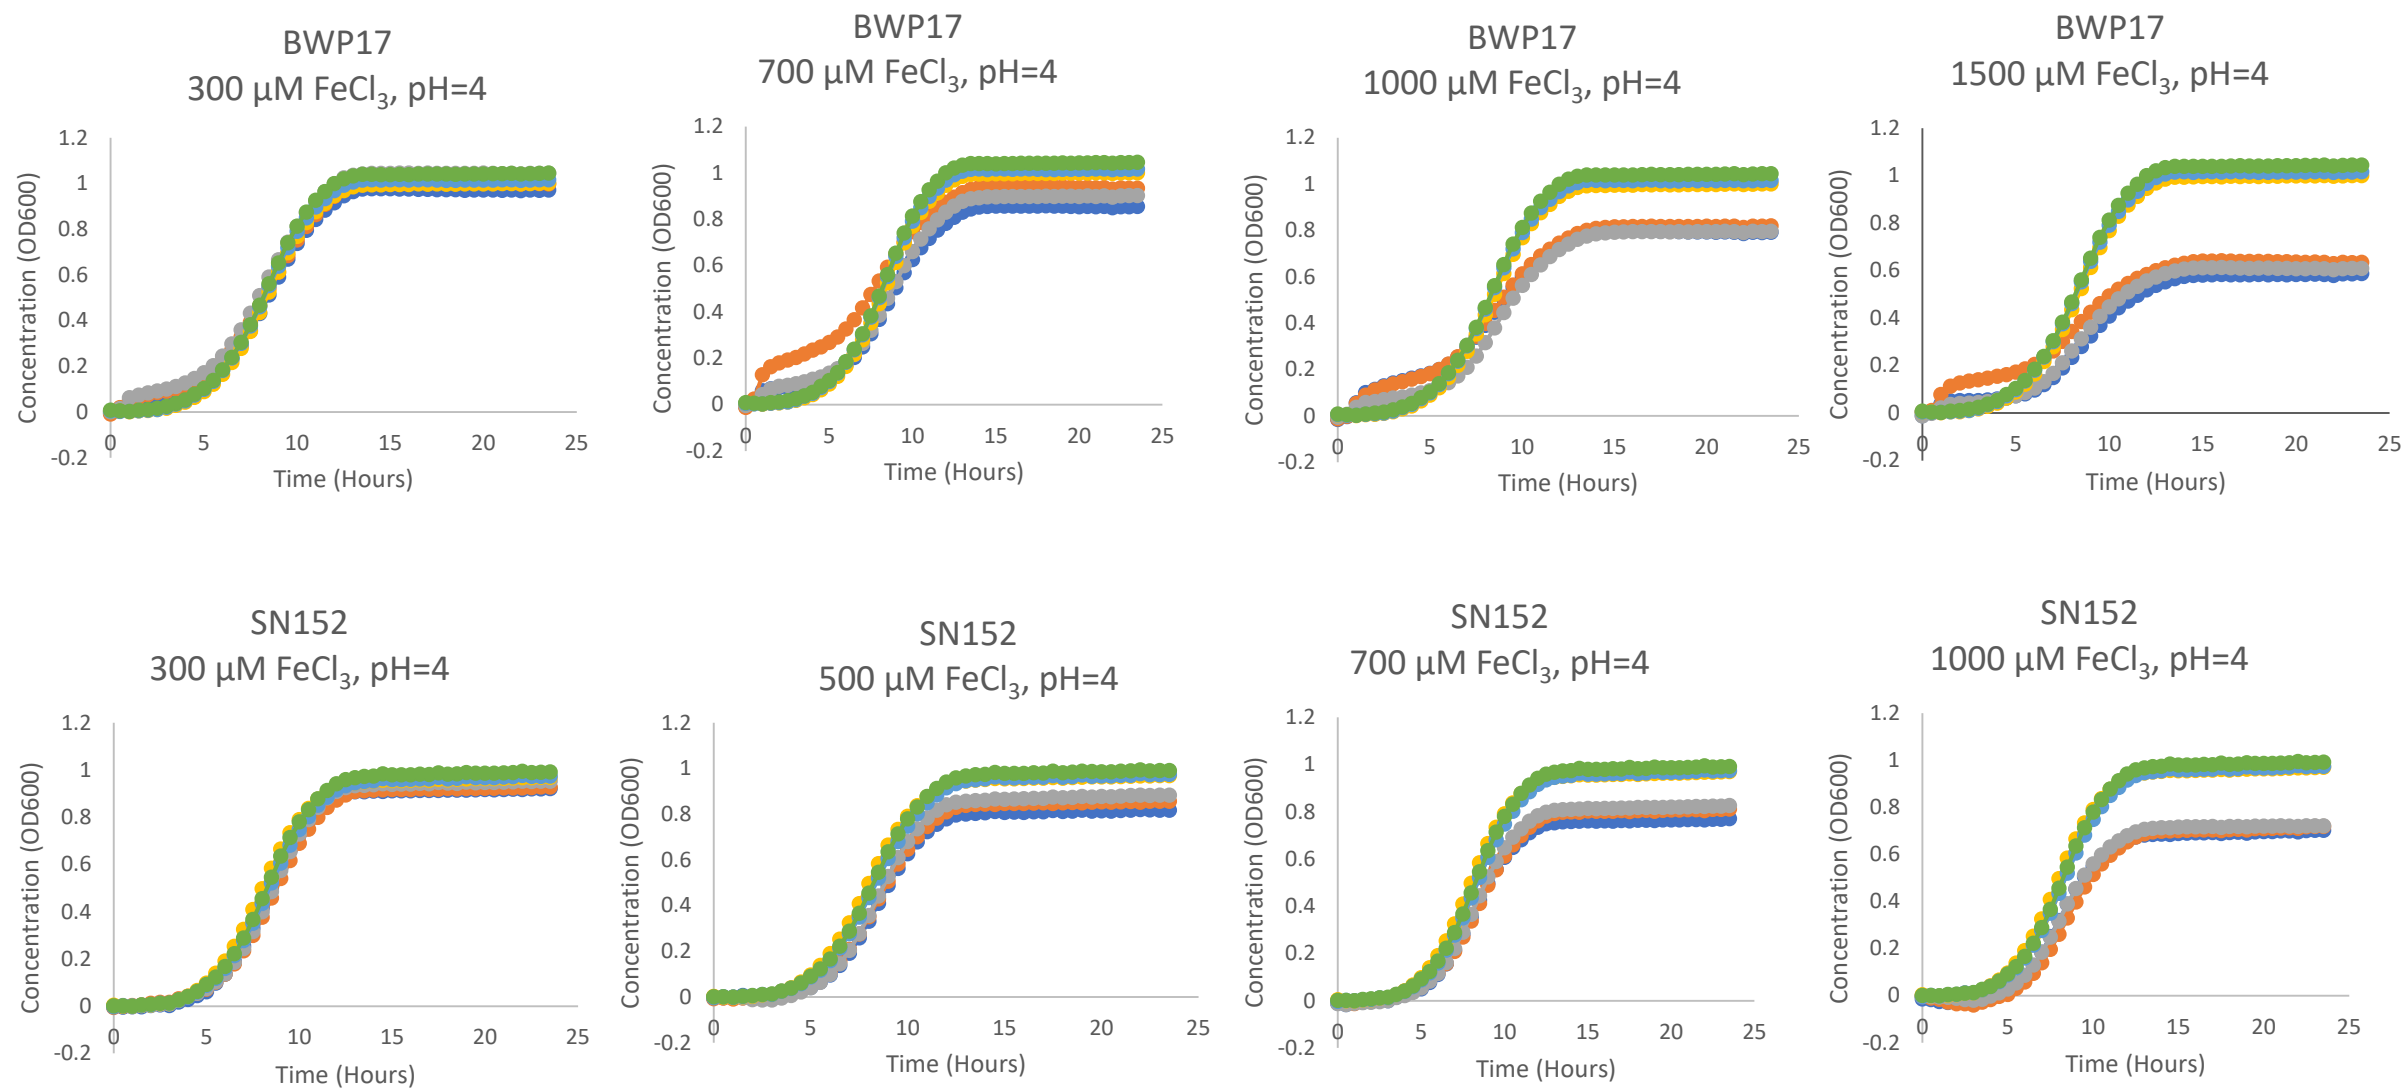

Figure S4

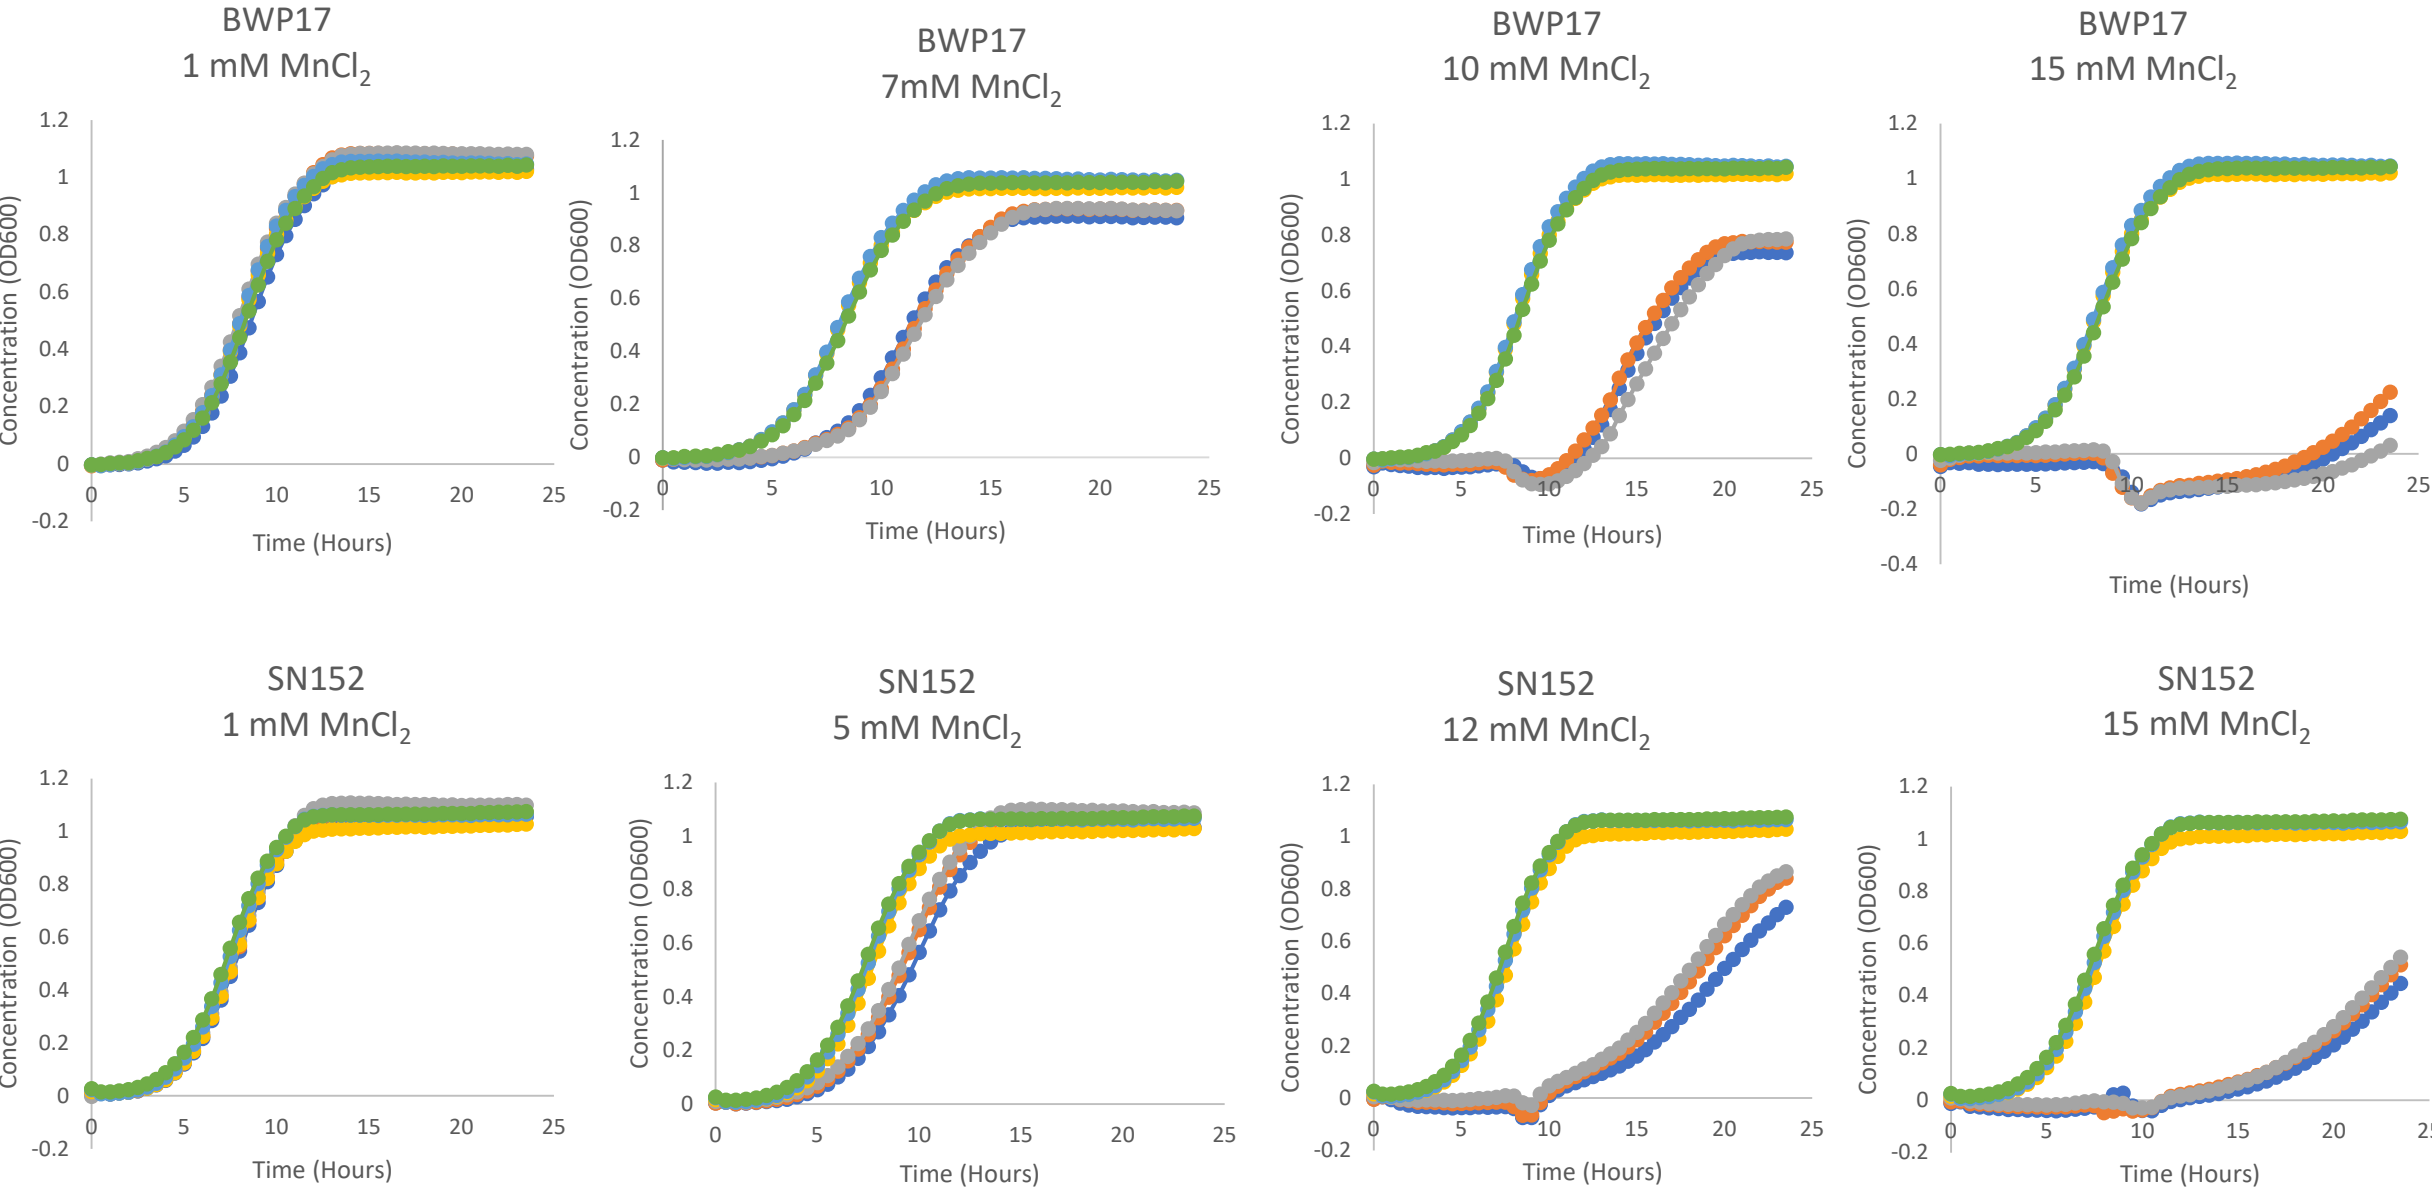

Figure S5

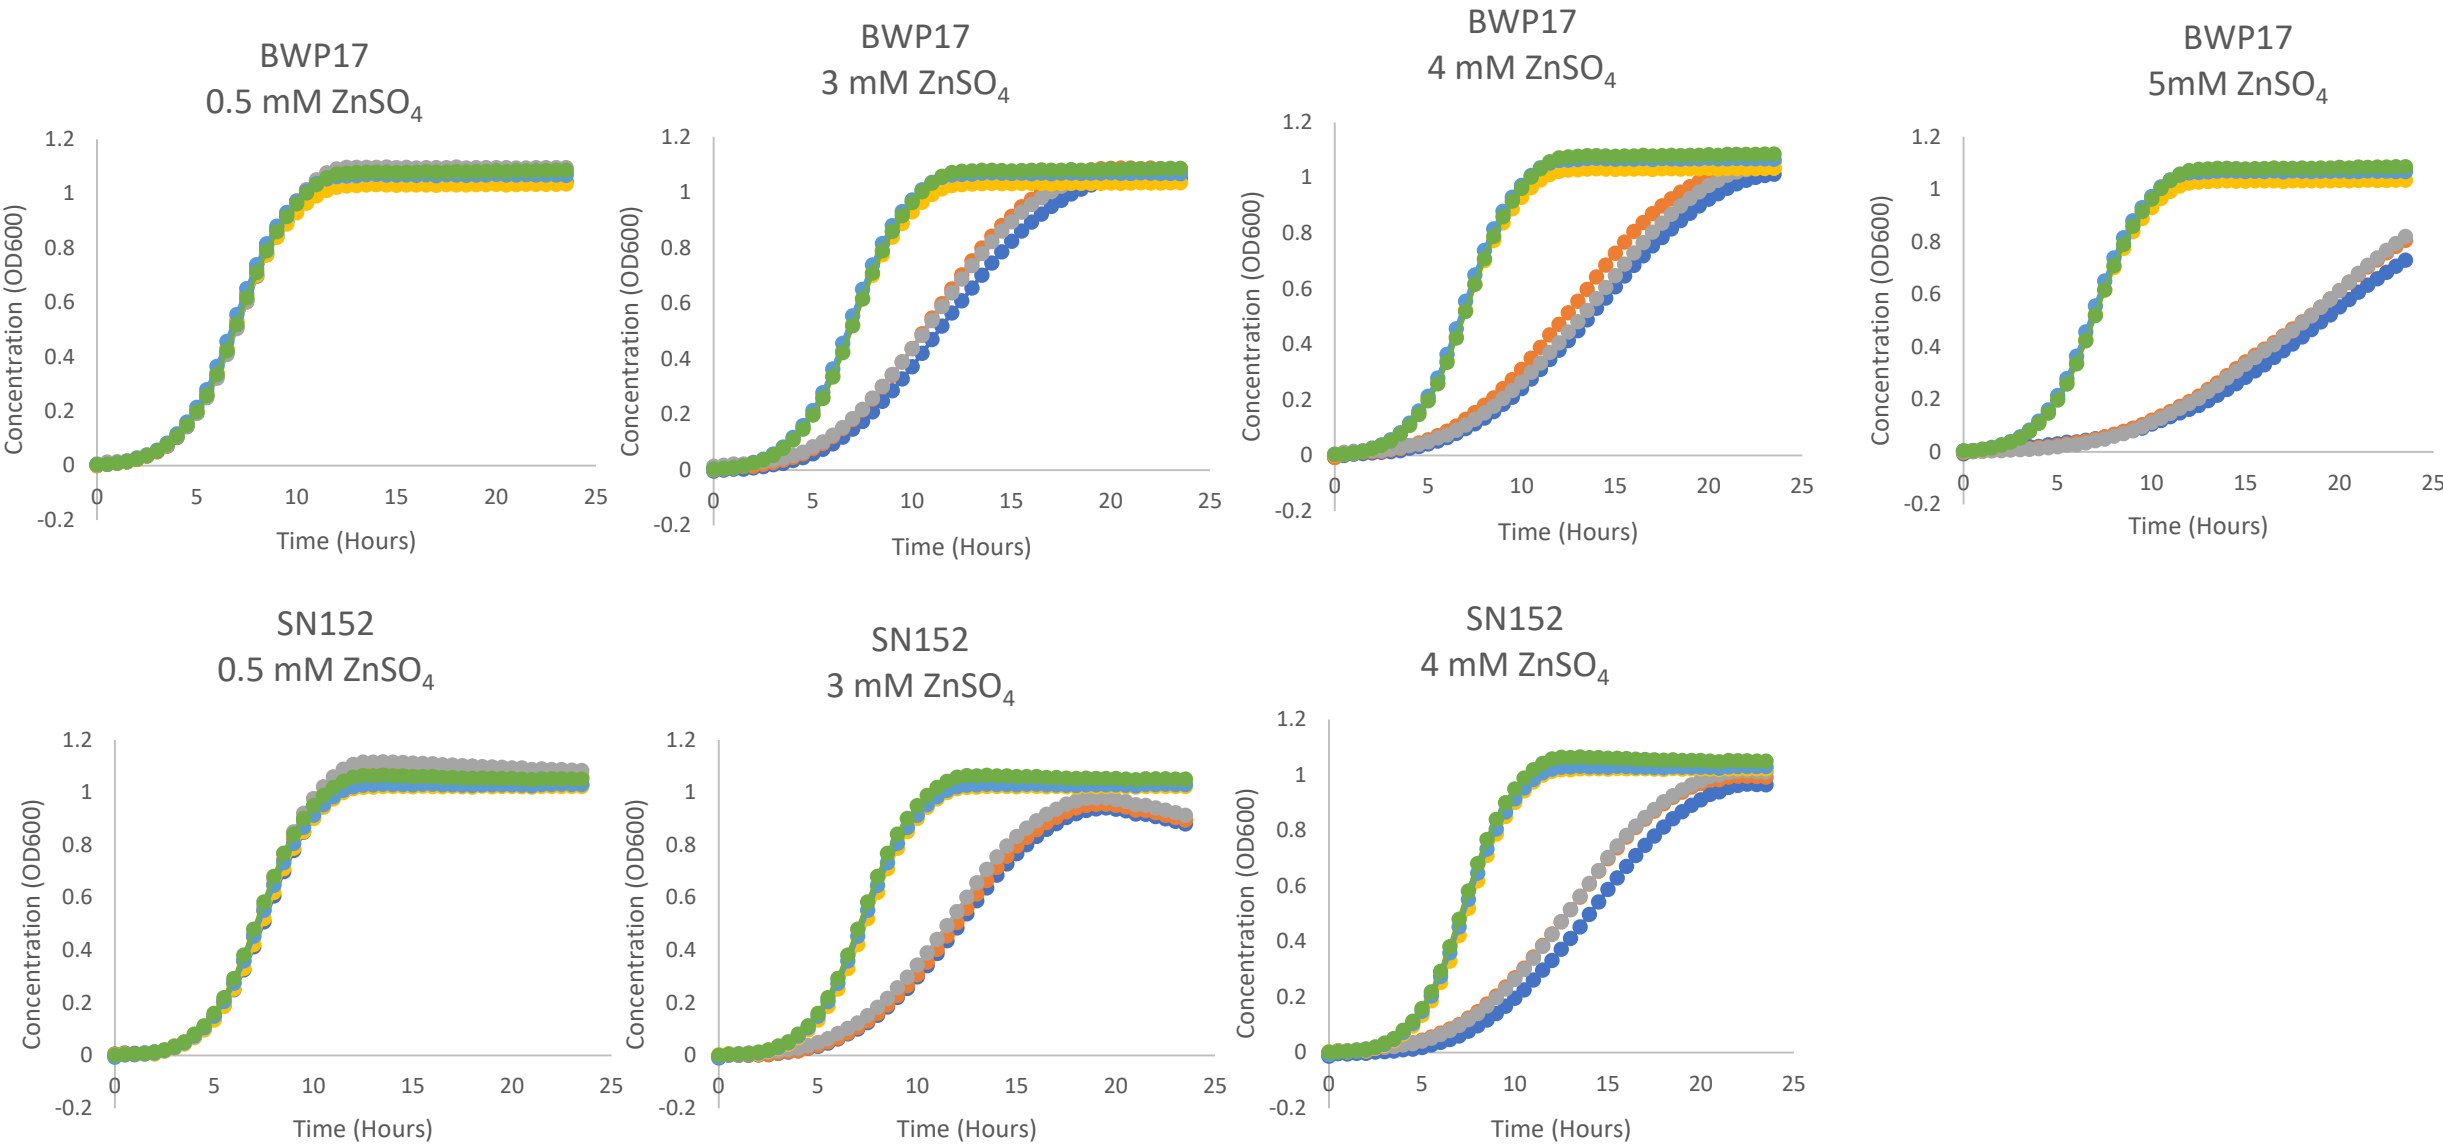

**Figure S6**

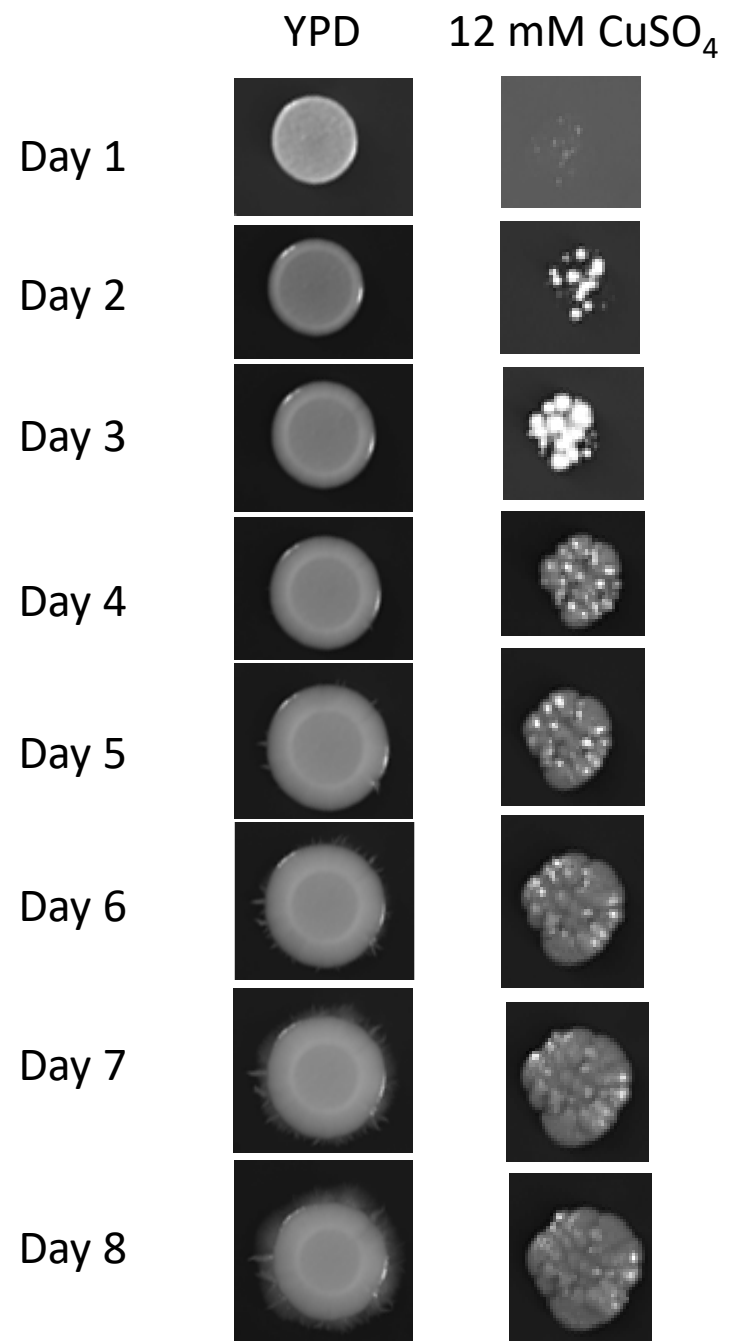

Supplement: Supplementary file 1 [file 1]
